# Supplementary material
Source: PubMed Central journal article supplement (PMC2964152)

# Supporting Information

## Discovery of novel 2-aryl-4-benzoyl-imidazoles targeting the colchicines binding site in tubulin as potential anticancer agents

Jianjun Chen<sup>a</sup>, Zhao Wang<sup>a</sup>, Chien-Ming Li<sup>b, c</sup>, Yan Lu<sup>a</sup>, Pavan K. Vaddady<sup>a</sup>, Bernd Meibohm<sup>a</sup>,  
James T. Dalton<sup>b, c</sup>, Duane D. Miller<sup>a, c</sup>, Wei Li<sup>a\*</sup>

<sup>a</sup> Department of Pharmaceutical Sciences, University of Tennessee Health Science Center,  
Memphis, TN 38163

<sup>b</sup> Division of Pharmaceutics, College of Pharmacy, The Ohio State University, Columbus, OH,  
43210

<sup>c</sup> GTX, Inc., Memphis, TN 38163

\* To whom correspondence should be addressed. Telephone: (901)448-7532. Fax: (901)448-6828. E-mail: wli@uthsc.edu

### Contents of Supplementary Information:

1. Figure S1: Dose-response curves for MDR cell line
2. Figure S2: Colchicine competition-binding
3. <sup>1</sup>H-NMR, HPLC purity determination and UV/Vis spectra for the active compounds

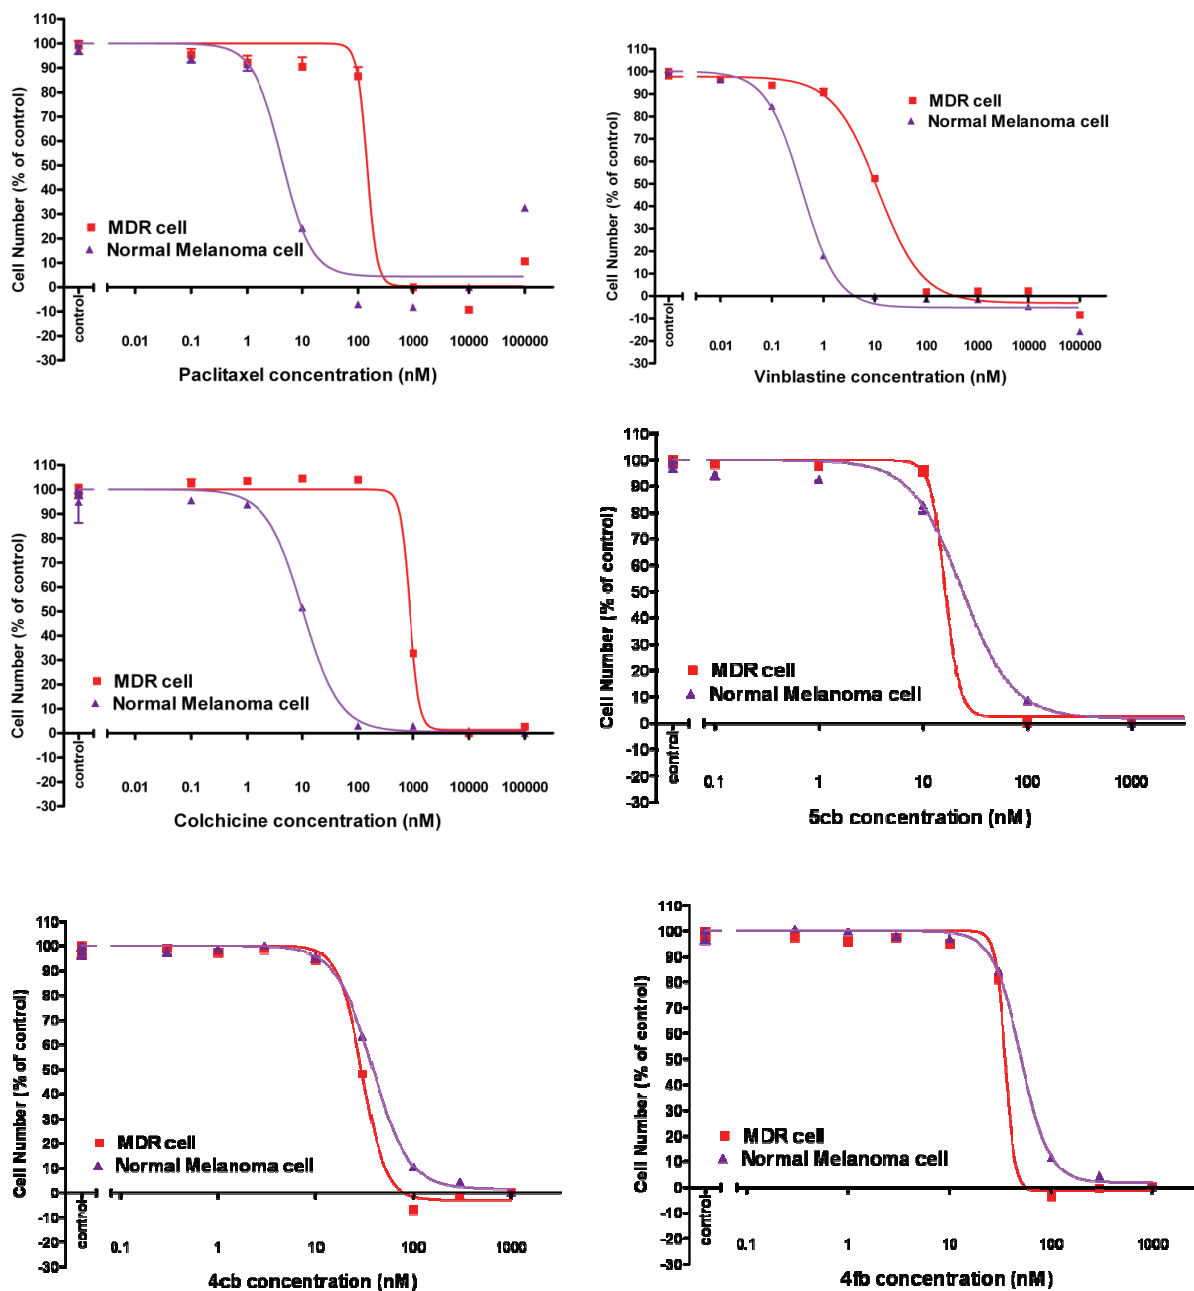

**Figure S1.** Dose-response curves of ABI compounds (5cb, 4cb, and 4fb) and comparison with other tubulin targeting agents (paclitaxel, vinblastine, and colchicine) on Pgp-mediated multidrug resistant melanoma cell line (MDR cell) and the match sensitive parent cell line (Normal Melanoma cell).

| Compound   | IC <sub>50</sub> ± SEM (n=3) |           |
|------------|------------------------------|-----------|
|            | Tubulin binding (μM)         | A375 (nM) |
| <b>5cb</b> | 3.4±1.5                      | 31±5      |
| Colchicine | 1.8±0.5                      | 20±3      |
| Paclitaxel | N/A                          | 12±3      |

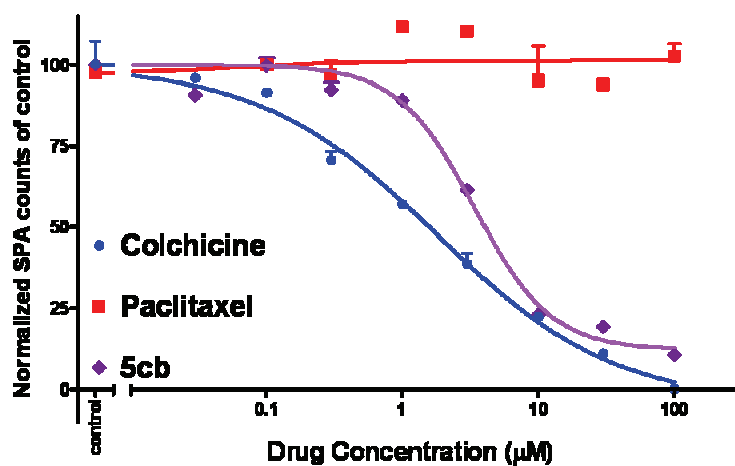

**Figure S2.** [<sup>3</sup>H]-colchicine competition-binding scintillation proximity assay showed that ABI compounds competitively bound to the colchicine binding site in tubulin.

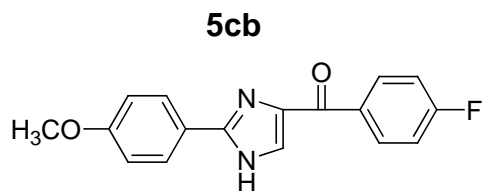

Chemical Formula:  $C_{17}H_{13}FN_2O_2$

Exact Mass: 296.10

Molecular Weight: 296.30

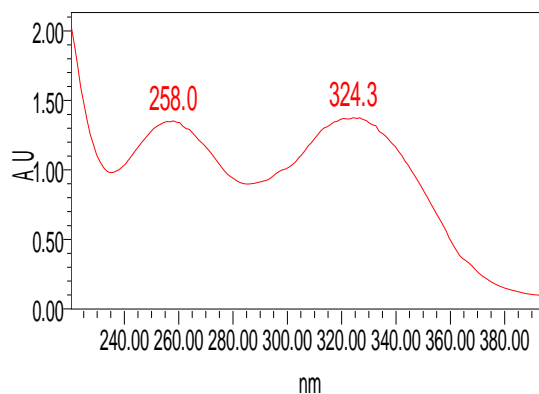

UV spectrum

### HPLC purity determination

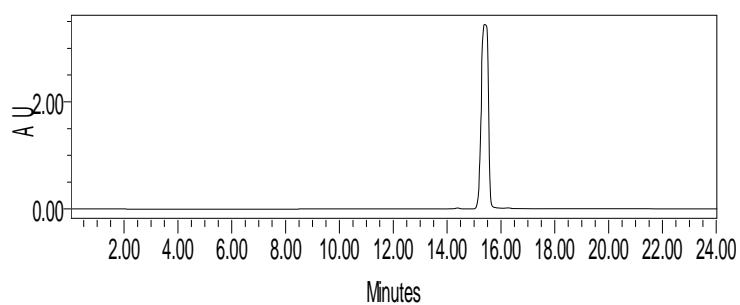

Purity=98.8%,  $t_R$ =15.4 min

### H-NMR spectrum (500 MHz, DMSO)

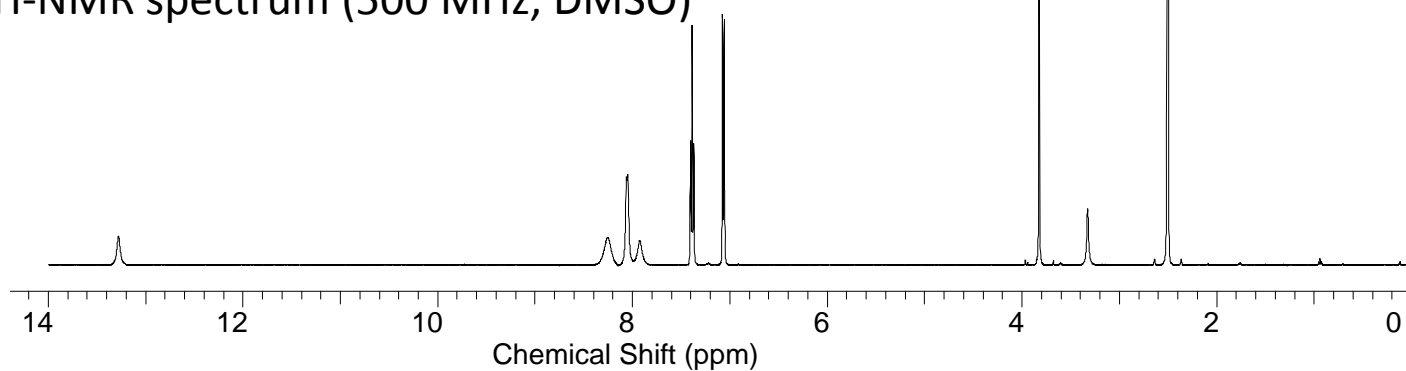

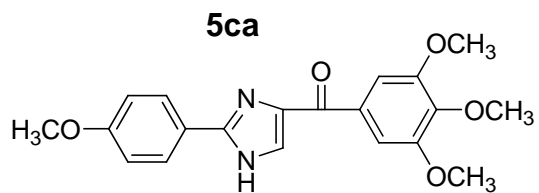

Chemical Formula:  $C_{20}H_{20}N_2O_5$

Exact Mass: 368.14

Molecular Weight: 368.38

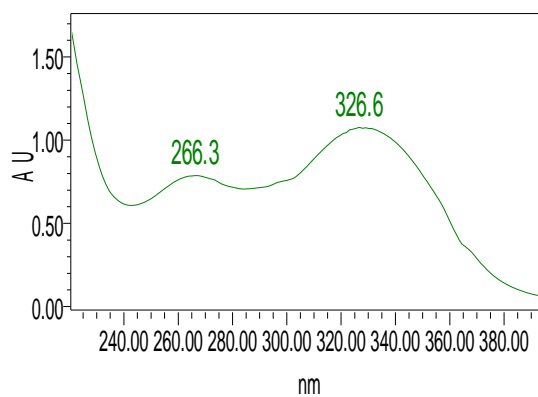

UV spectrum

### HPLC purity determination

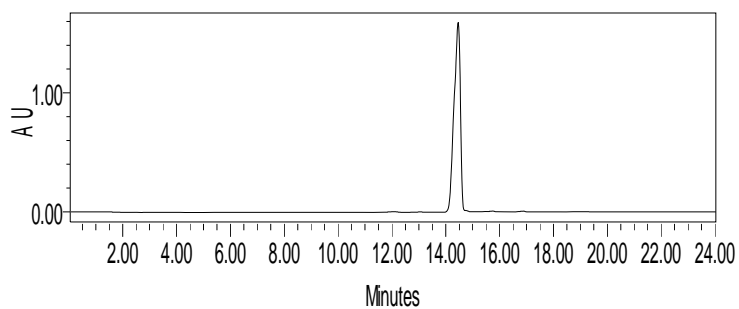

Purity=98.4%,  $t_R=14.46$  min

### H-NMR spectrum (300 MHz, $CDCl_3$ )

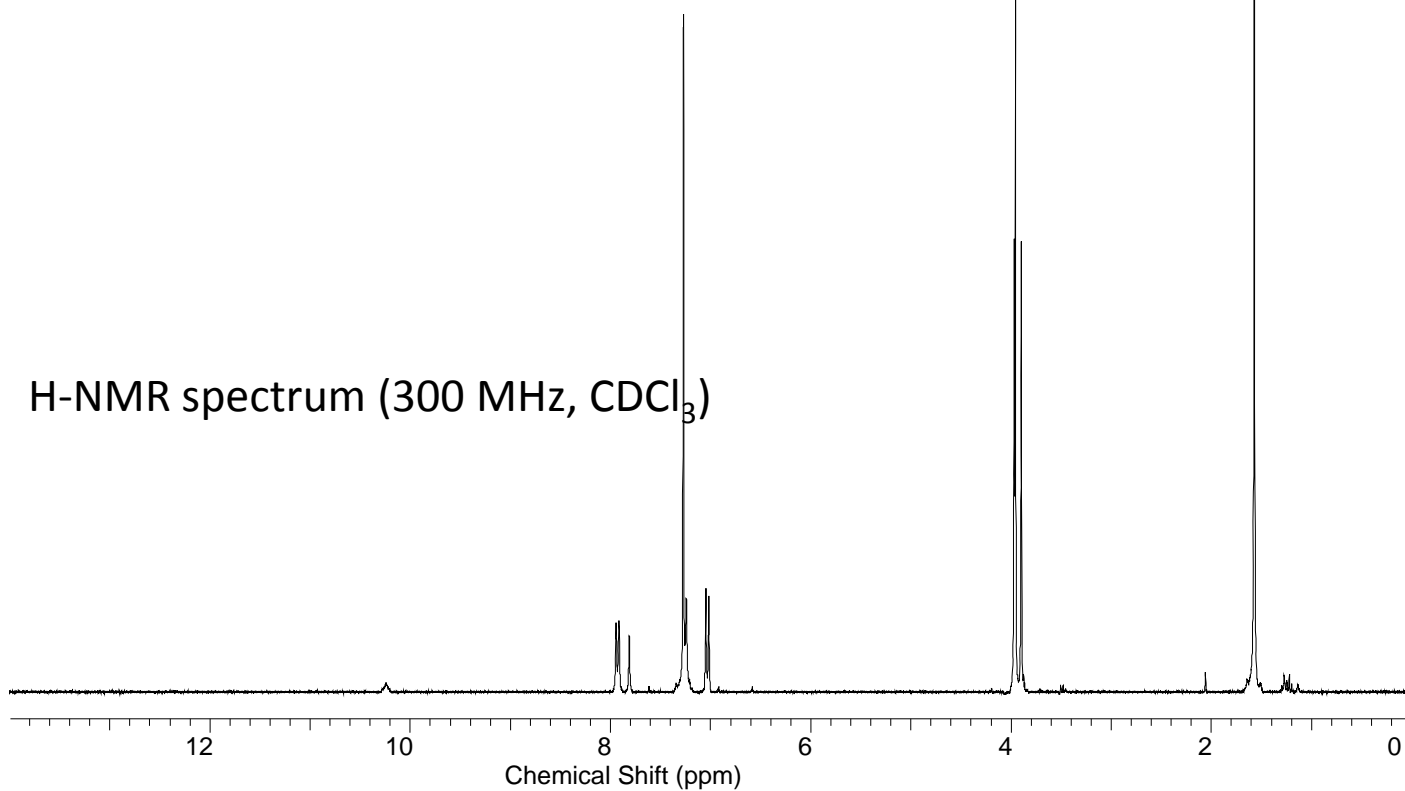

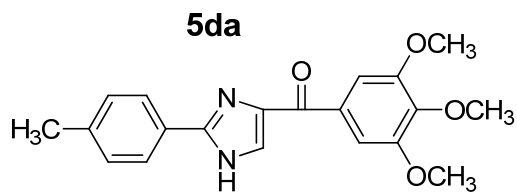

Chemical Formula:  $C_{20}H_{20}N_2O_4$

Exact Mass: 352.14

Molecular Weight: 352.38

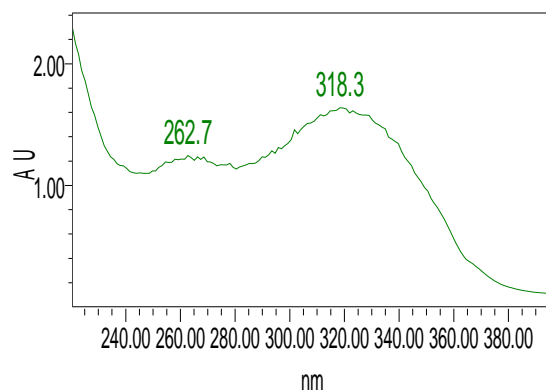

### HPLC purity determination

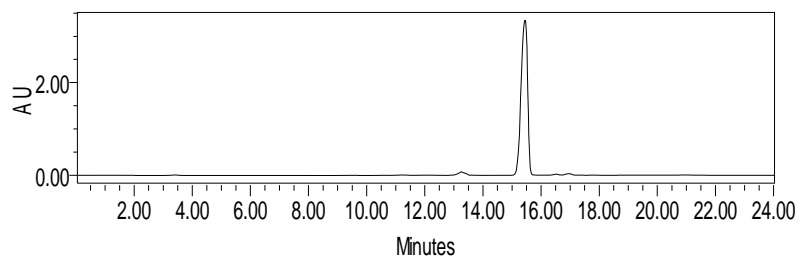

### H-NMR spectrum (500 MHz, $CDCl_3$ )

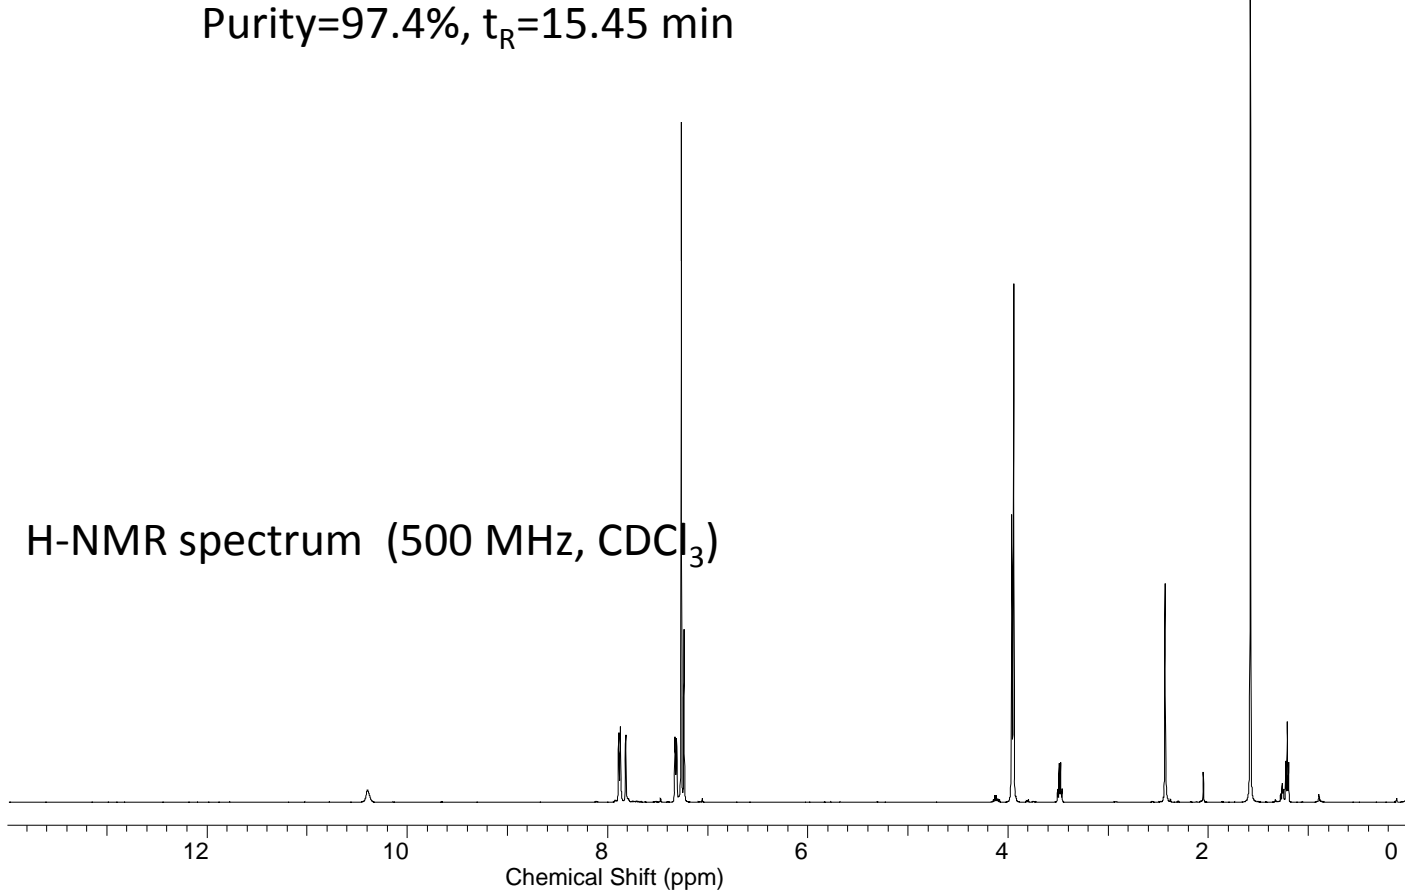

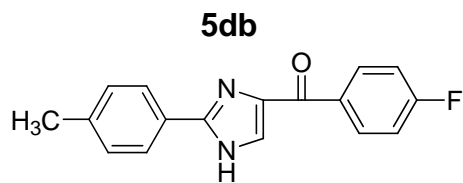

Chemical Formula: C<sub>17</sub>H<sub>13</sub>FN<sub>2</sub>O

Exact Mass: 280.10

Molecular Weight: 280.30

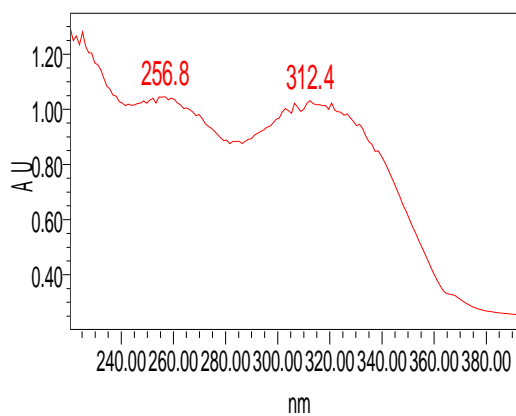

UV spectrum

### HPLC purity determination

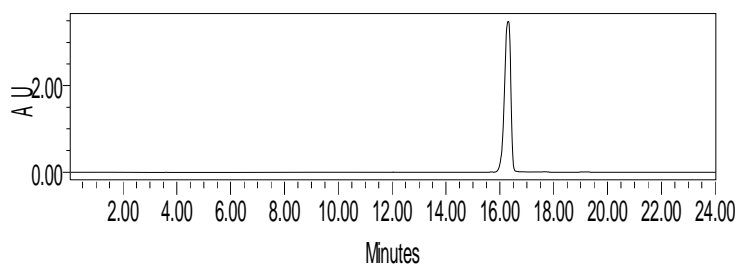

Purity >99%, t<sub>R</sub>=16.31 min

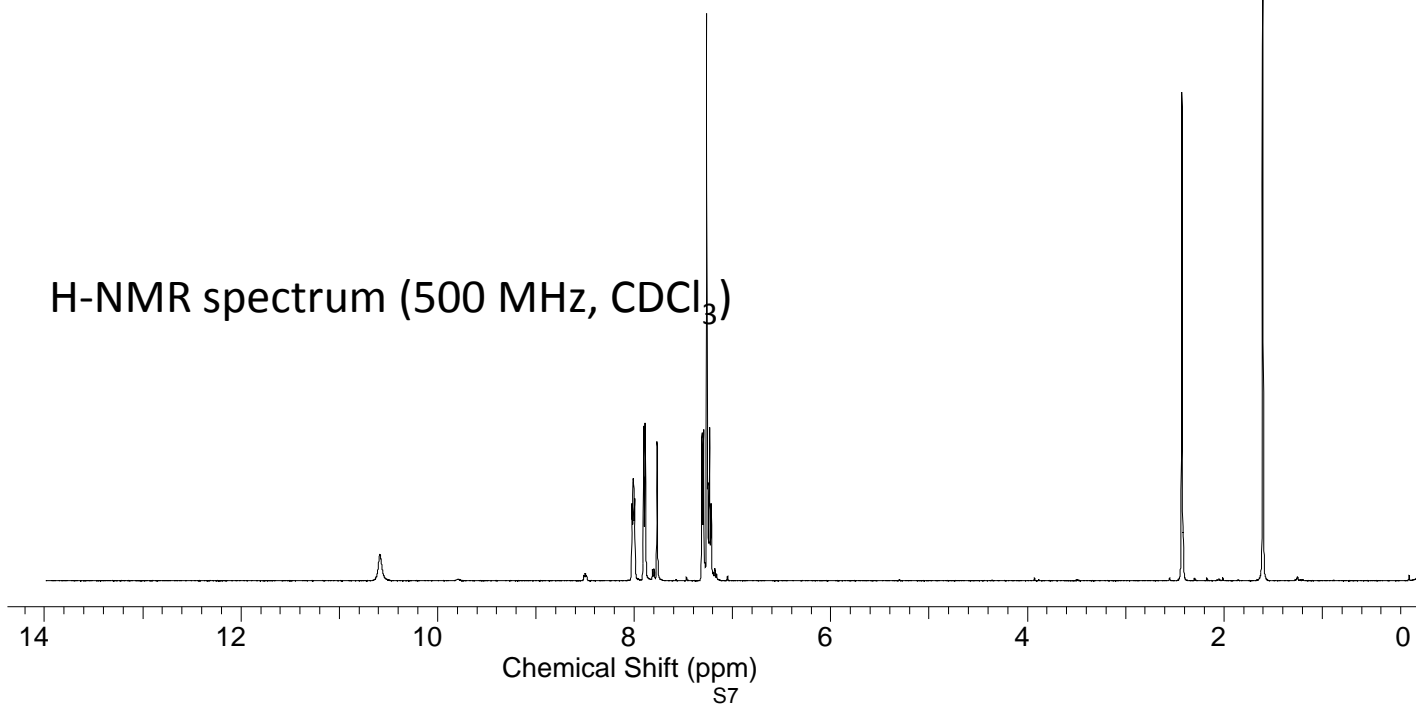

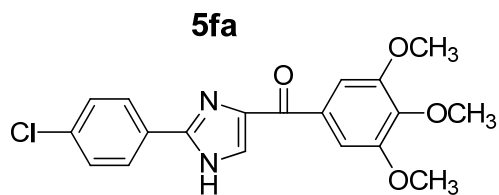

Chemical Formula:  $C_{19}H_{17}ClN_2O_4$

Exact Mass: 372.09

Molecular Weight: 372.80

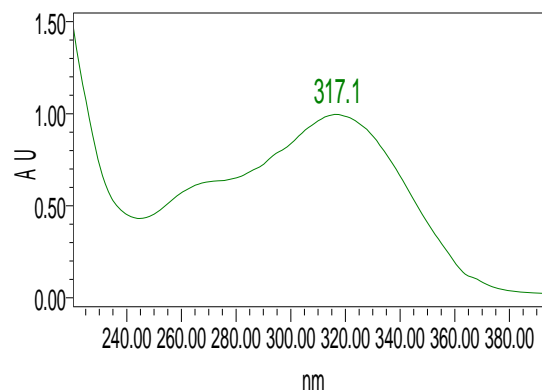

UV spectrum

### HPLC purity determination

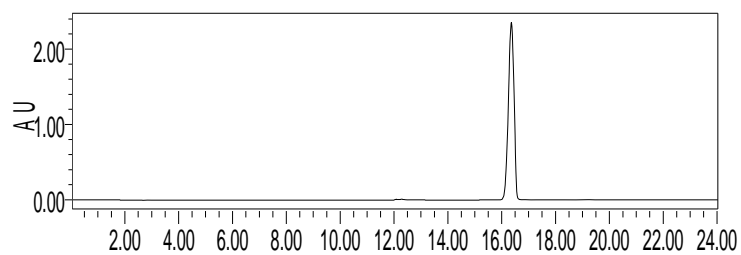

Purity >99%,  $t_R = 16.36$  min

### H-NMR spectrum (500 MHz, $CDCl_3$ )

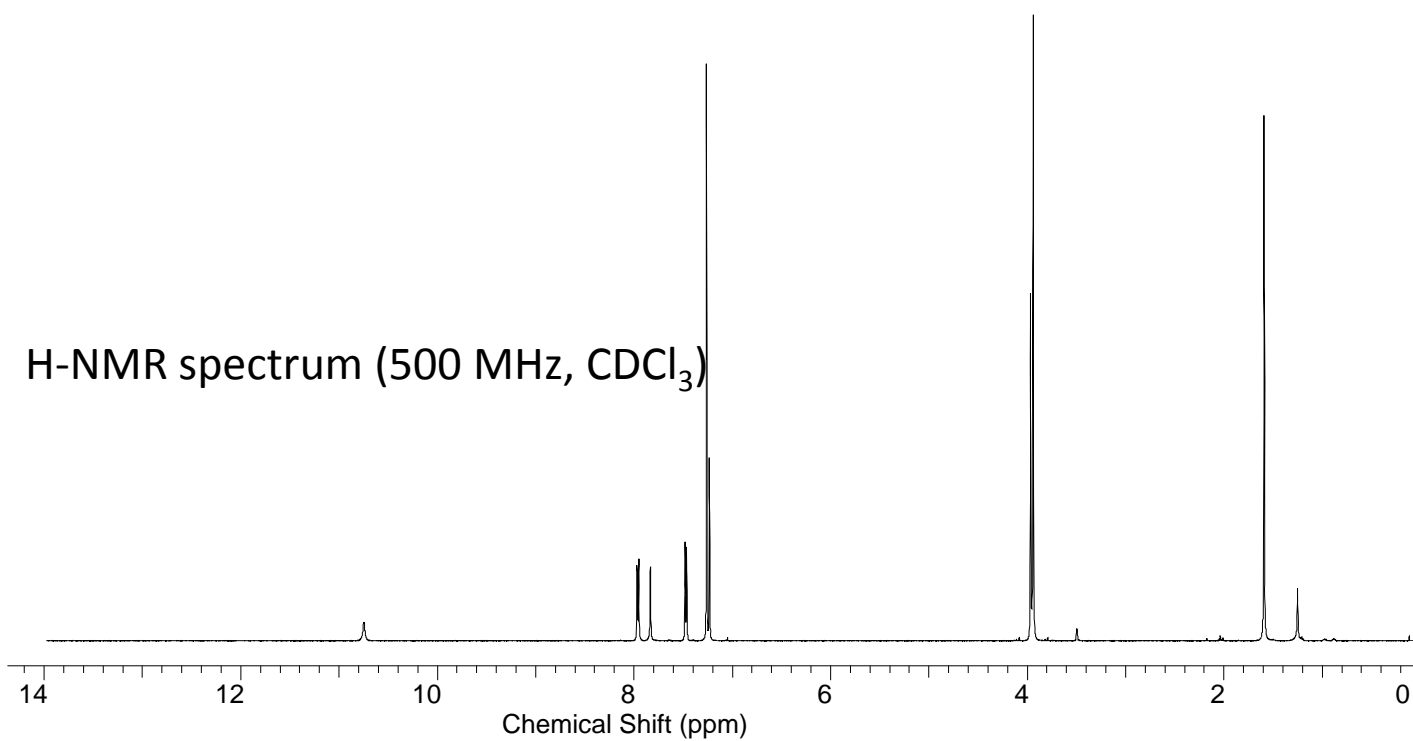



**5fb**

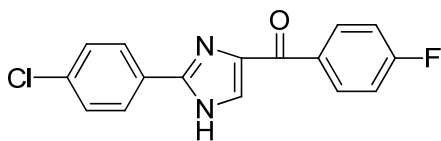

Chemical Formula:  $C_{16}H_{10}ClFN_2O$

Exact Mass: 300.05

Molecular Weight: 300.71

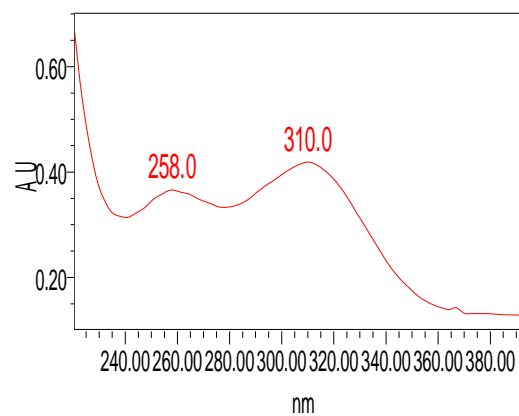

UV spectrum

### HPLC purity determination

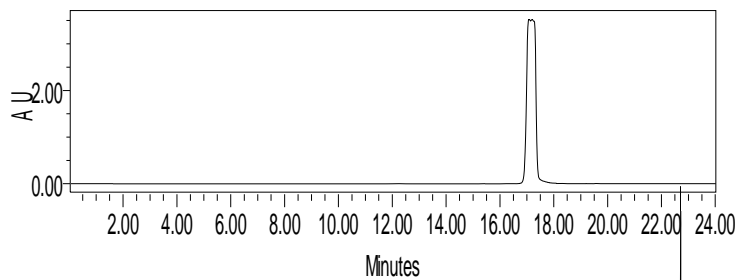

Purity >99%,  $t_R=17.08$  min

### H-NMR spectrum (500 MHz, $CDCl_3$ )

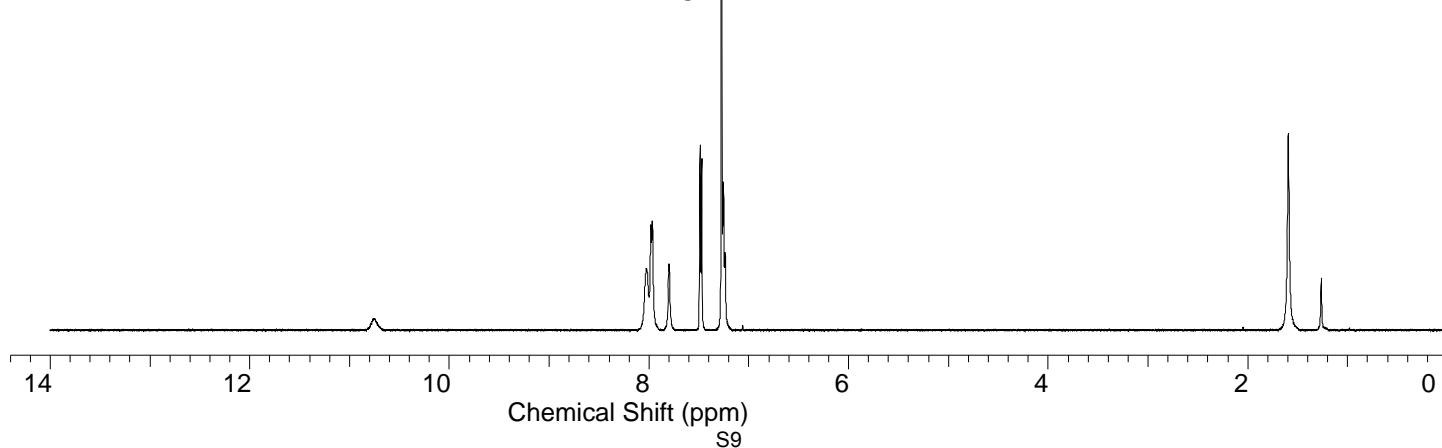

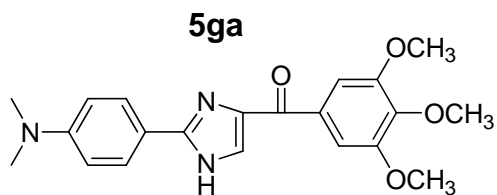

Chemical Formula:  $C_{21}H_{23}N_3O_4$   
Exact Mass: 381.17  
Molecular Weight: 381.43

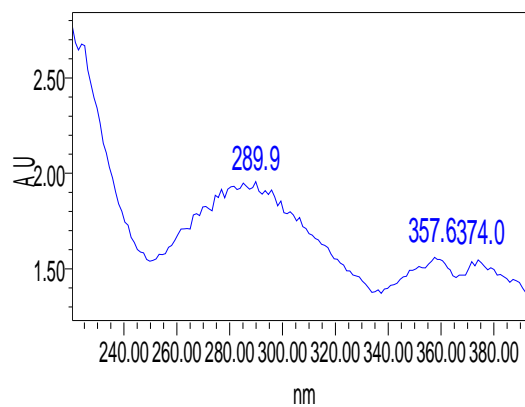

UV spectrum

### HPLC purity determination

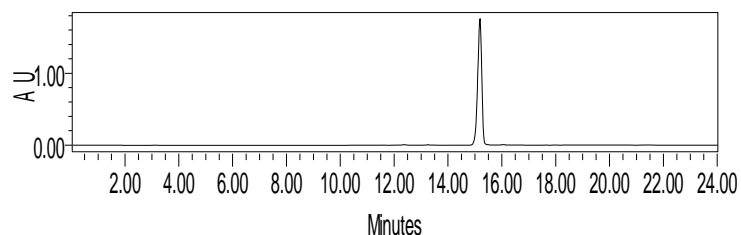

Purity=95.8%,  $t_R$ =15.20 min

### H-NMR spectrum (500 MHz, $CDCl_3$ )

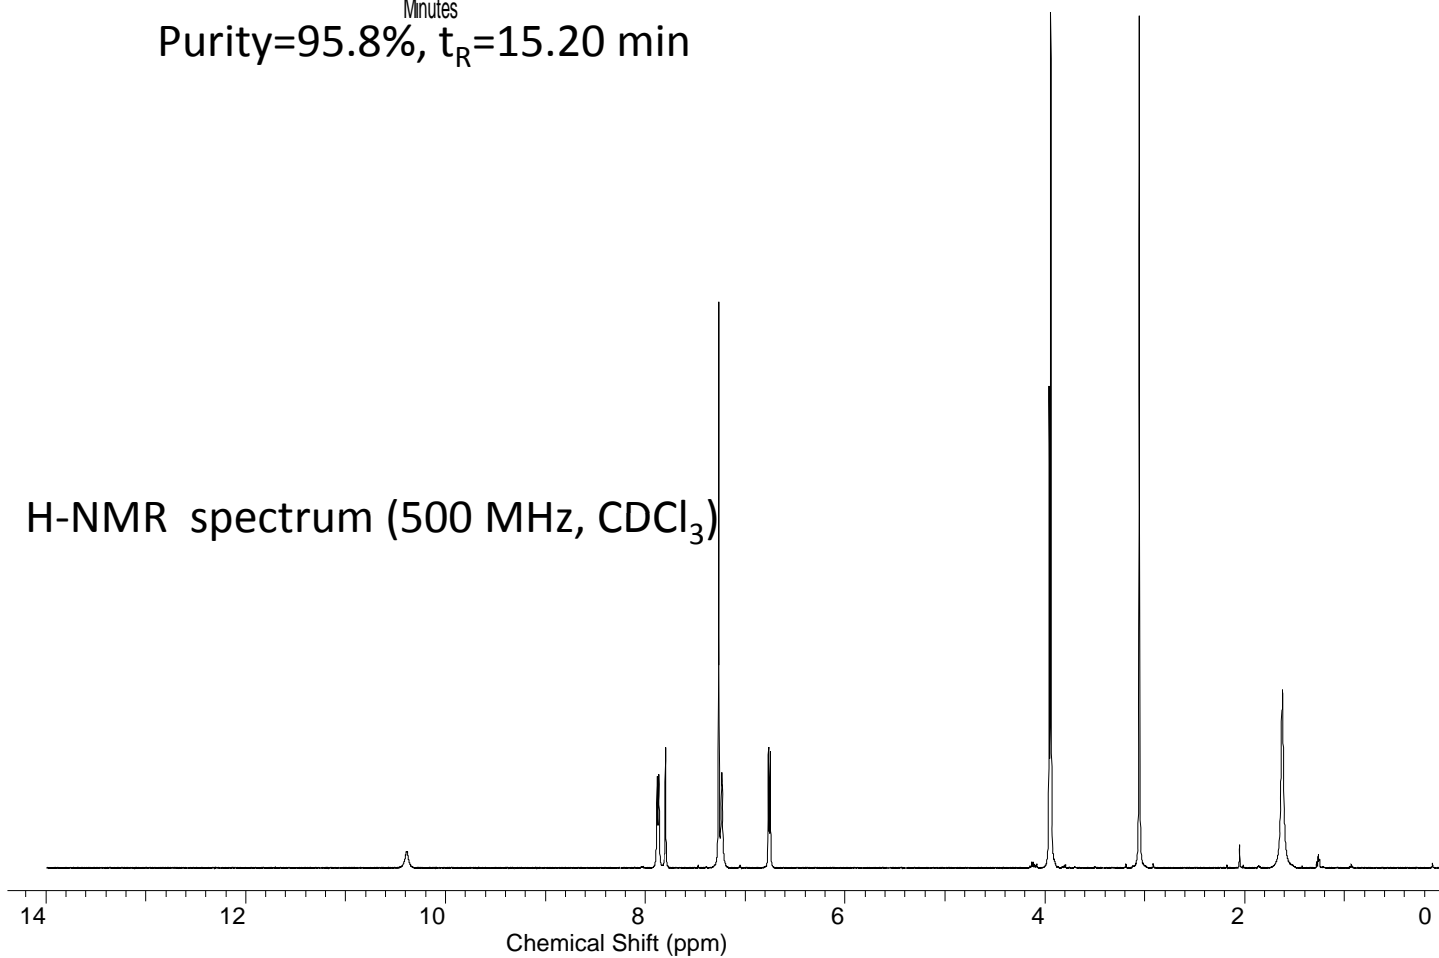

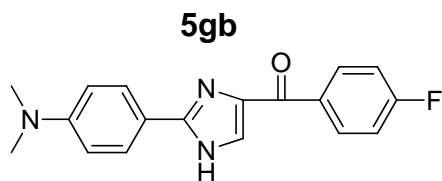

Chemical Formula:  $C_{18}H_{16}FN_3O$

Exact Mass: 309.13

Molecular Weight: 309.34

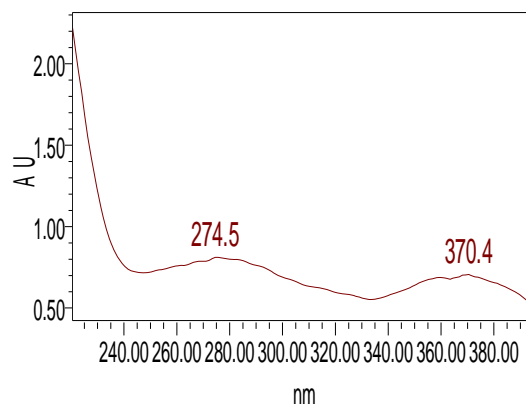

UV spectrum

### HPLC purity determination

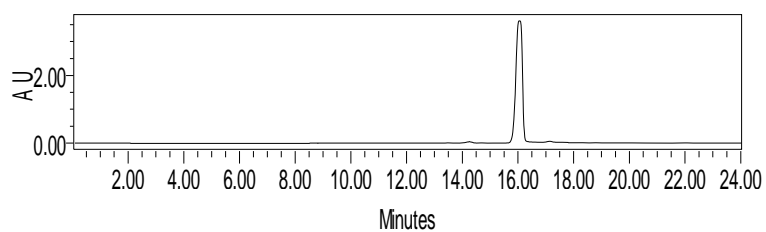

Purity=95.6%,  $t_R=16.06$  min

### H-NMR spectrum (500 MHz, $CDCl_3$ )

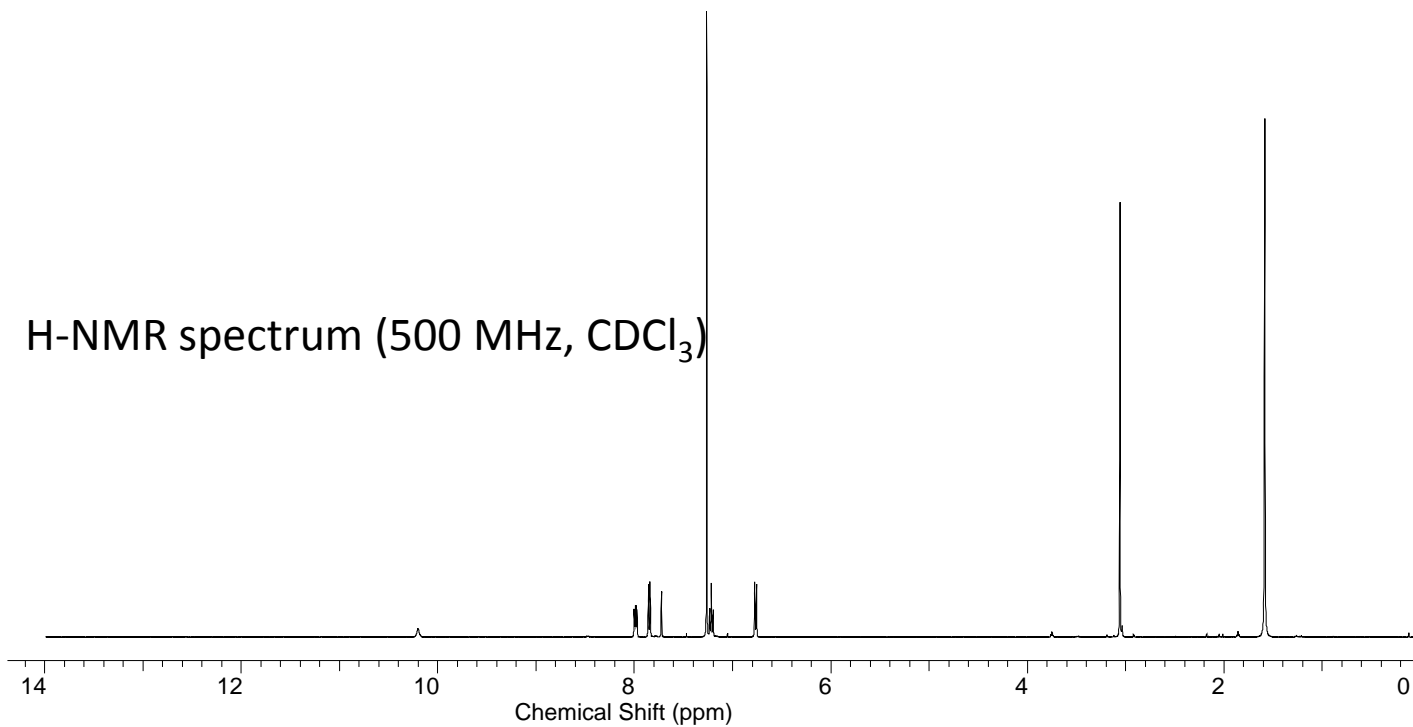

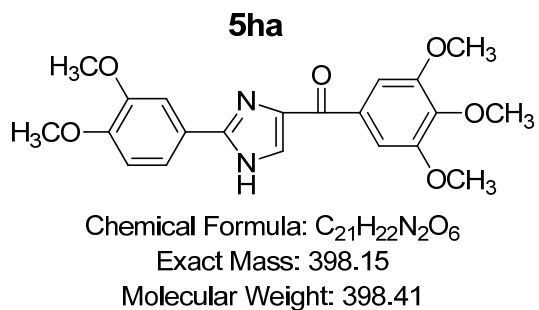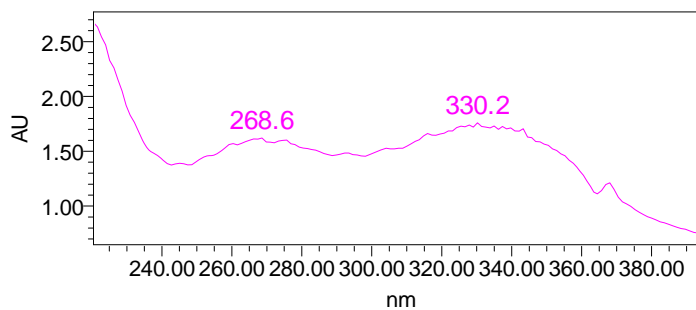

UV spectrum

### HPLC purity determination

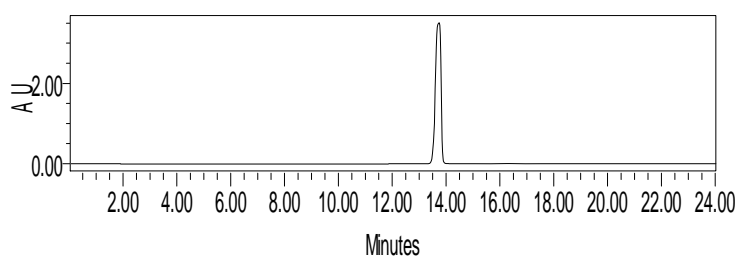

Purity >99%,  $t_R = 13.73$  min

### H-NMR spectrum (500 MHz, $CDCl_3$ )

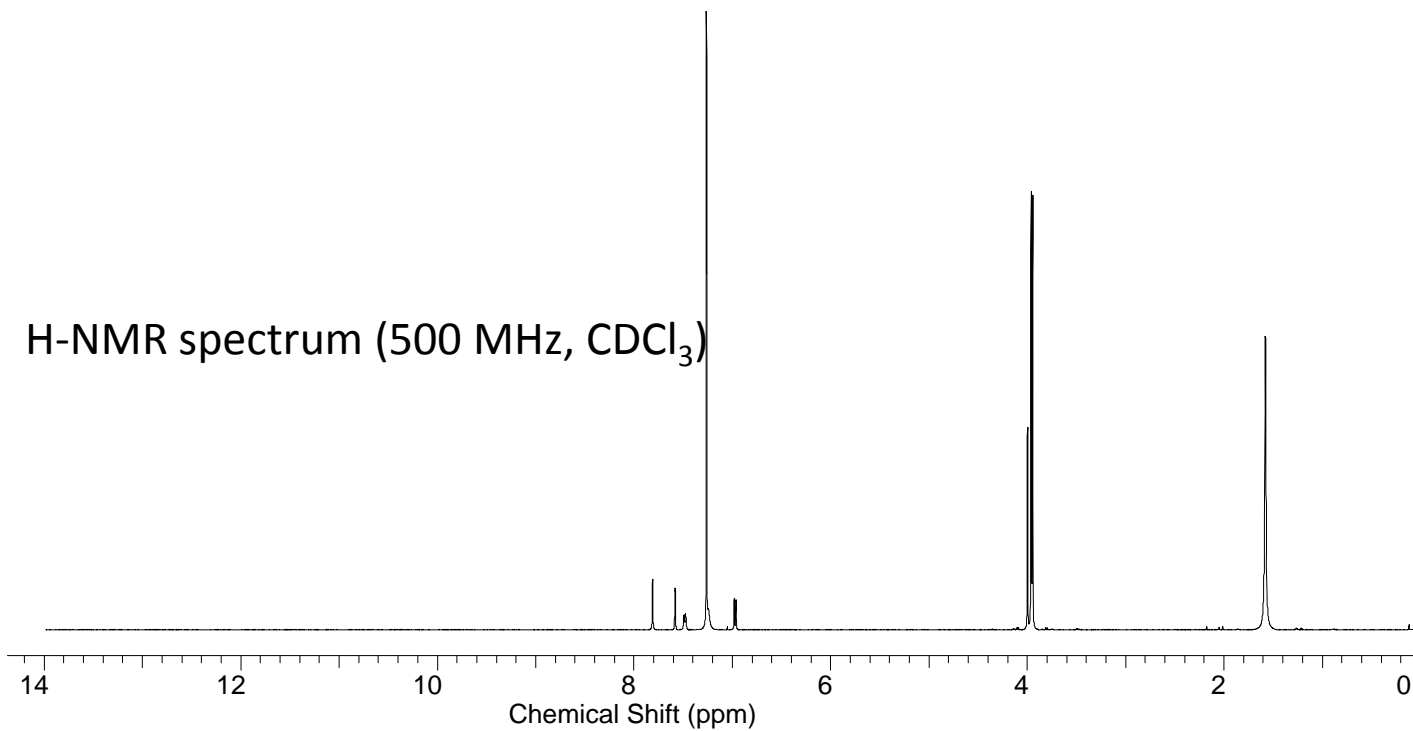

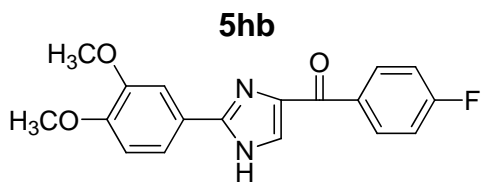

Chemical Formula:  $C_{18}H_{15}FN_2O_3$

Exact Mass: 326.11

Molecular Weight: 326.32

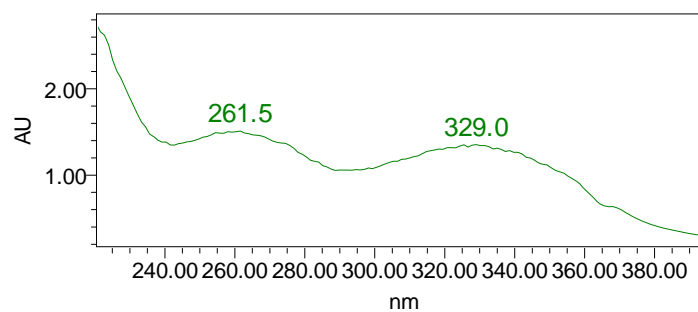

UV spectrum

### HPLC purity determination

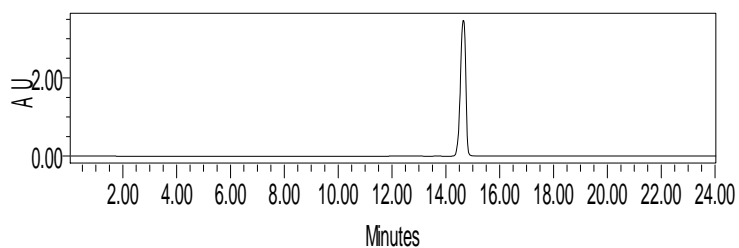

Purity > 99%,  $t_R = 14.65$  min

### H-NMR spectrum (500 MHz, $CDCl_3$ )

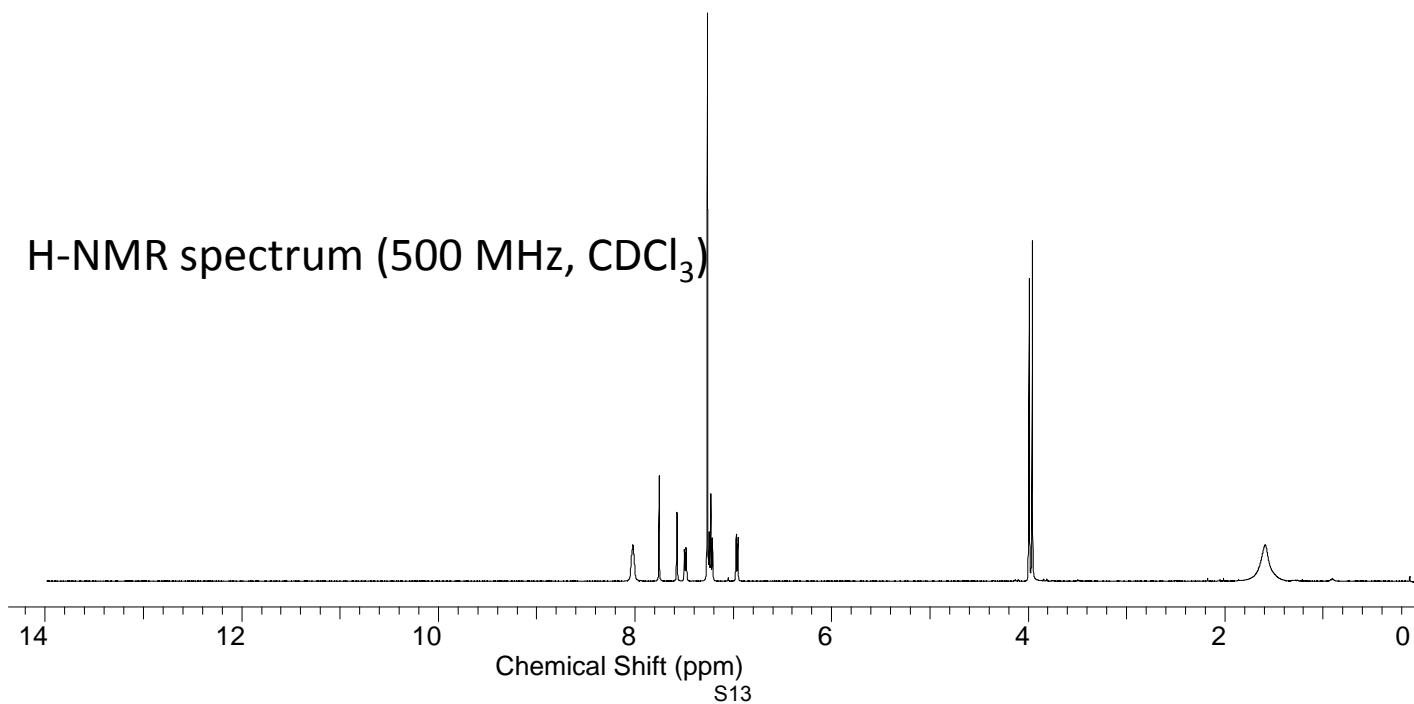

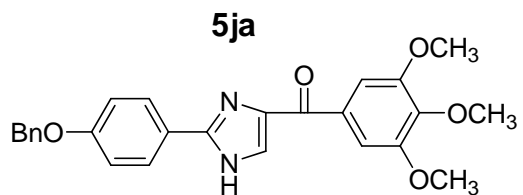

Chemical Formula:  $C_{26}H_{24}N_2O_5$

Exact Mass: 444.17

Molecular Weight: 444.48

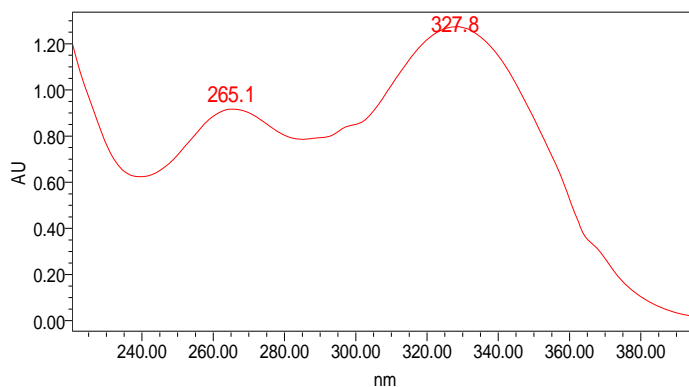

UV spectrum

### HPLC purity determination

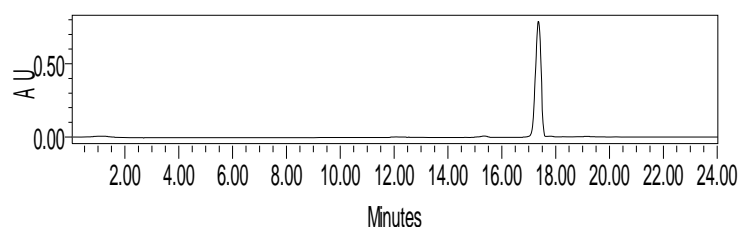

Purity=95.5%,  $t_R$ =17.36 min

### H-NMR spectrum (500 MHz, $CDCl_3$ )

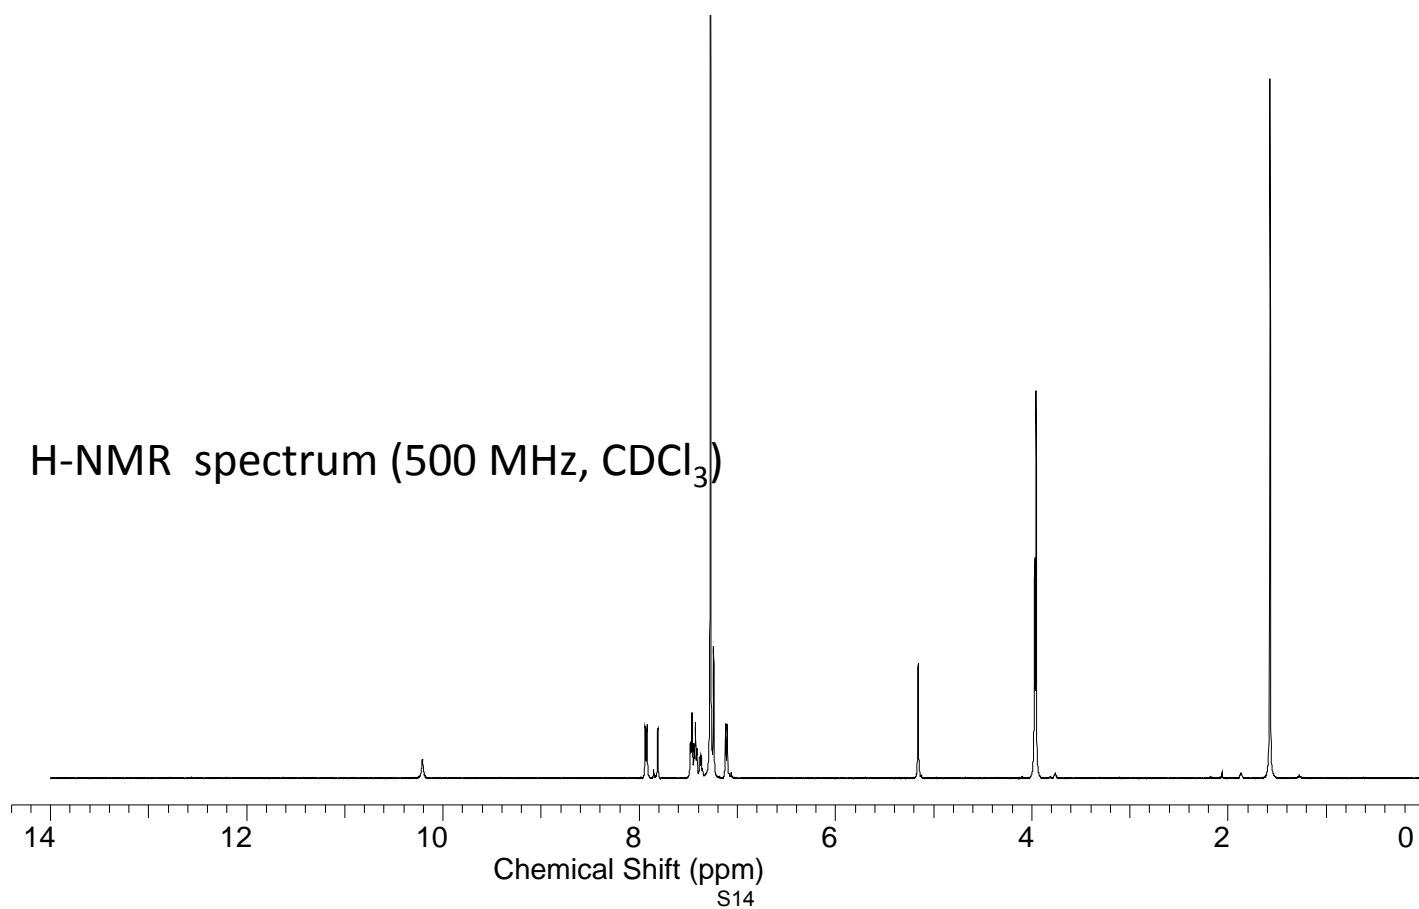

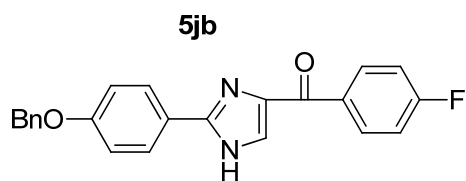

Chemical Formula:  $C_{23}H_{17}N_2O_2$

Exact Mass: 353.13

Molecular Weight: 353.39

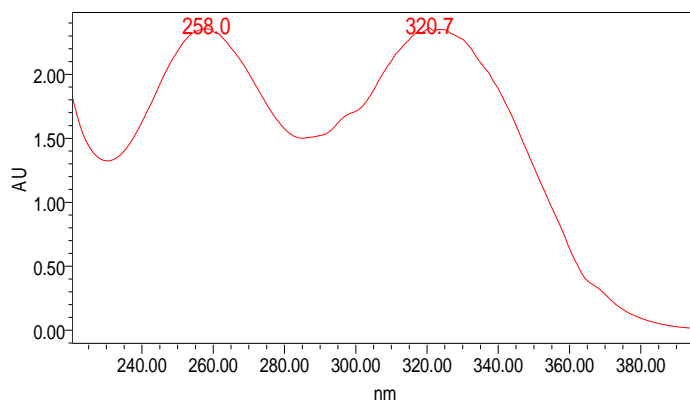

UV spectrum

### HPLC purity determination

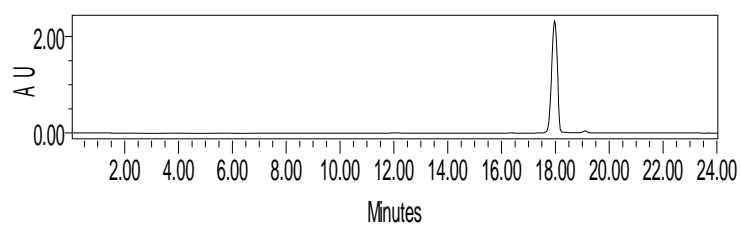

Purity=97.8%,  $t_R$ =17.97 min

### H-NMR spectrum (300 MHz, $CDCl_3$ )

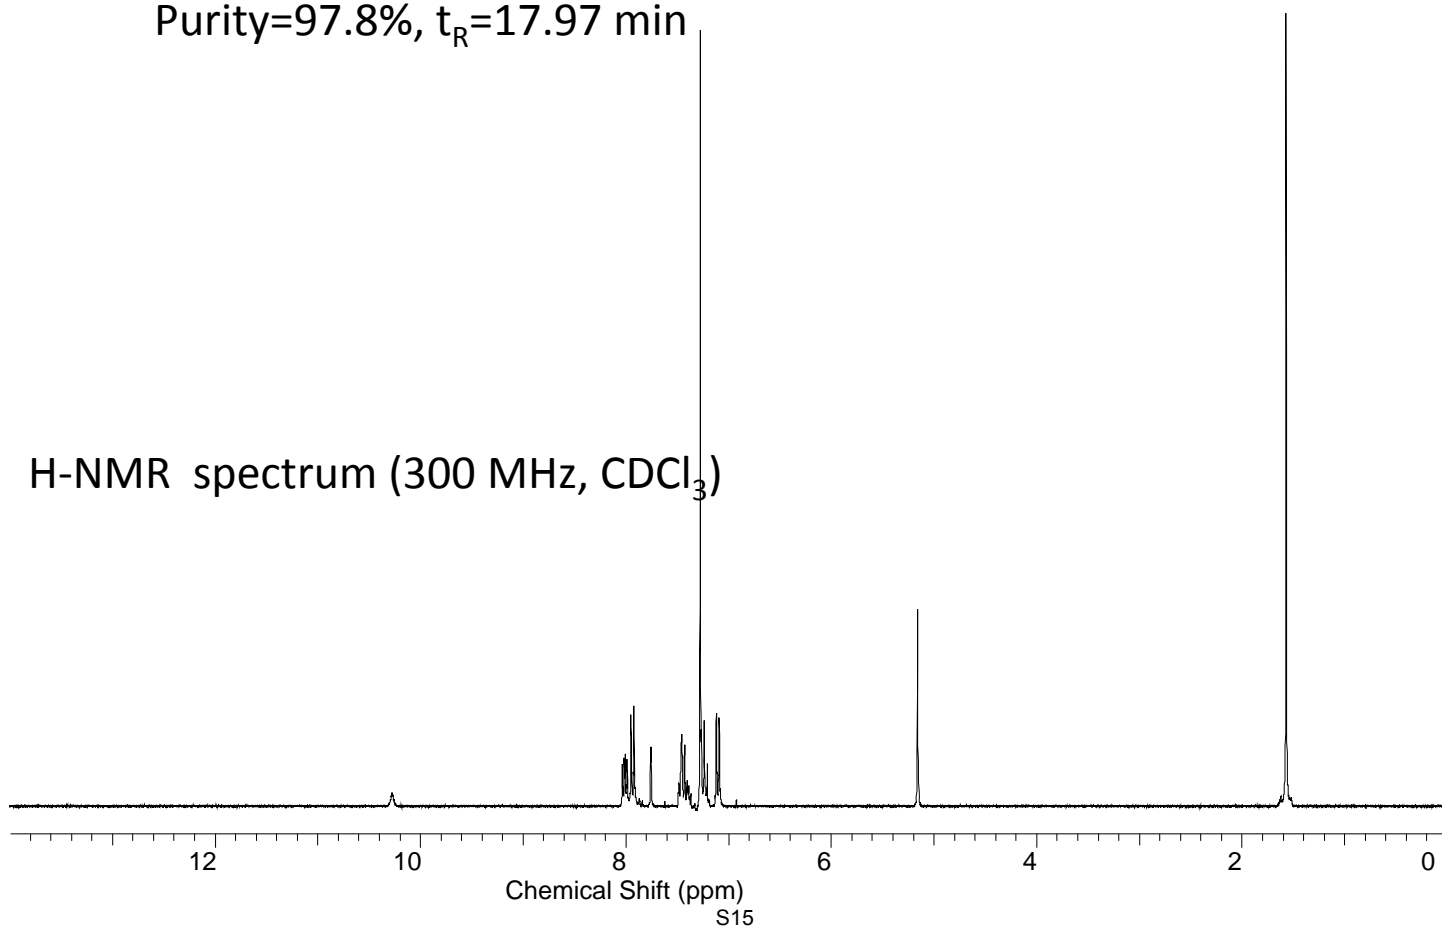

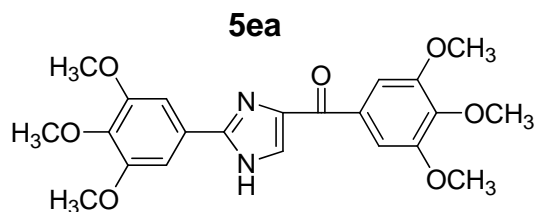

Chemical Formula:  $C_{22}H_{24}N_2O_7$

Exact Mass: 428.16

Molecular Weight: 428.44

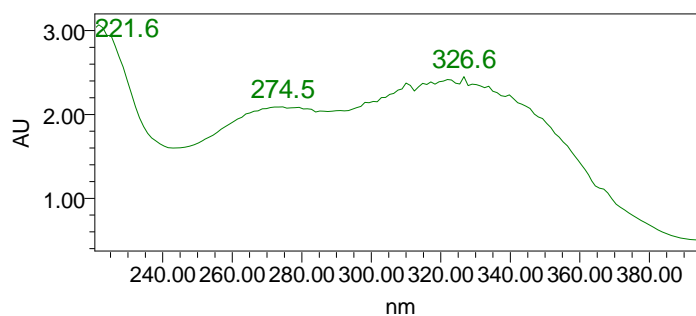

UV spectrum

### HPLC purity determination

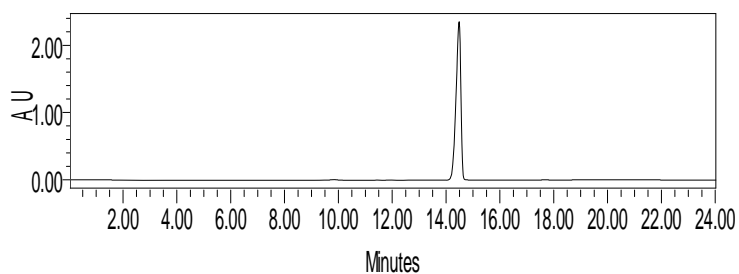

Purity >99%,  $t_R = 14.49$  min

### H-NMR spectrum (500 MHz, $CDCl_3$ )

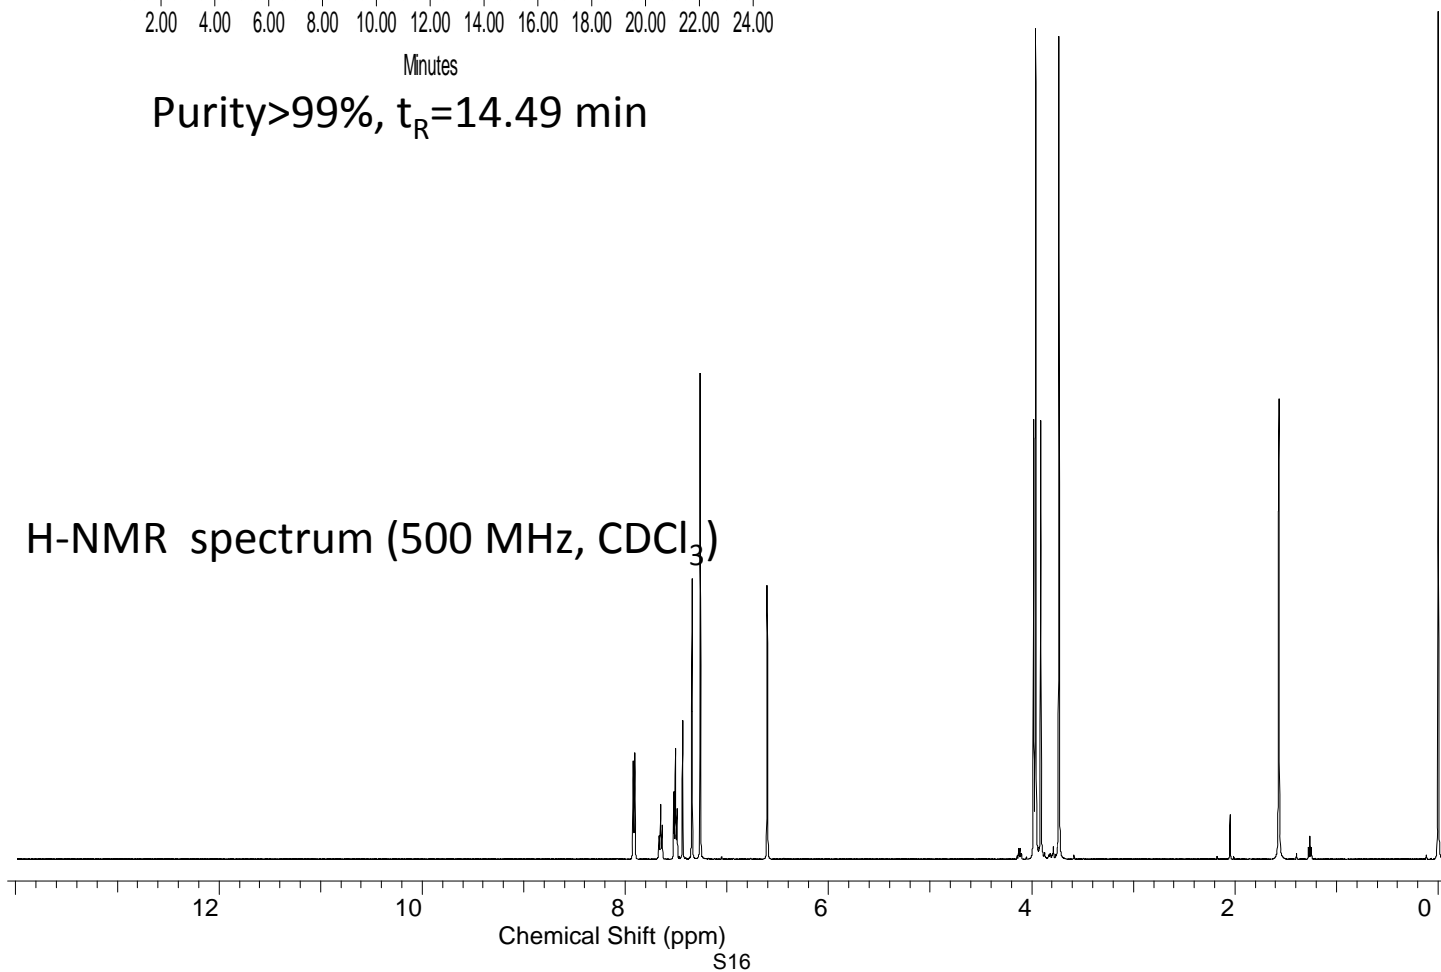



### 5eb

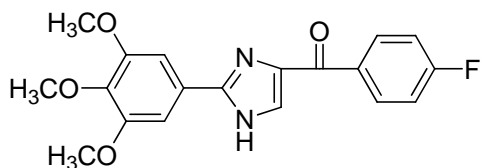

Chemical Formula:  $C_{19}H_{17}FN_2O_4$

Exact Mass: 356.12

Molecular Weight: 356.35

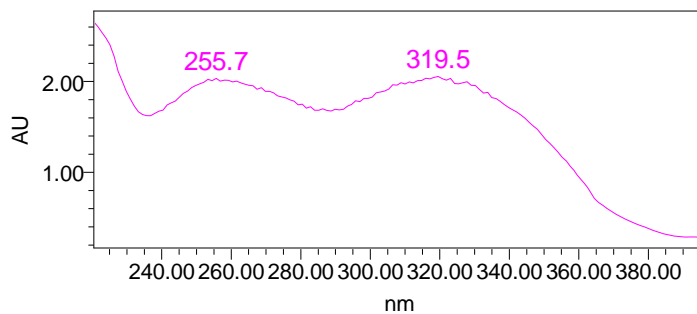

UV spectrum

### HPLC purity determination

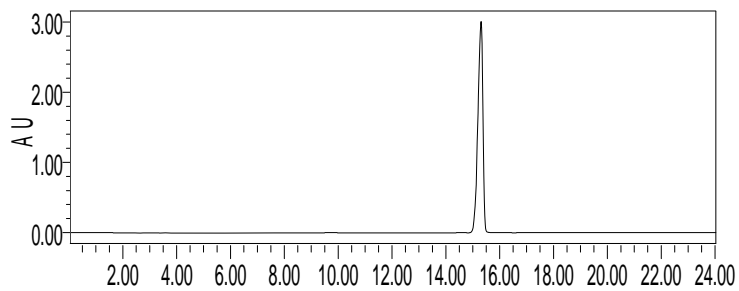

Purity > 99%,  $t_R = 15.31$  min

### H-NMR spectrum (500 MHz, $CDCl_3$ )

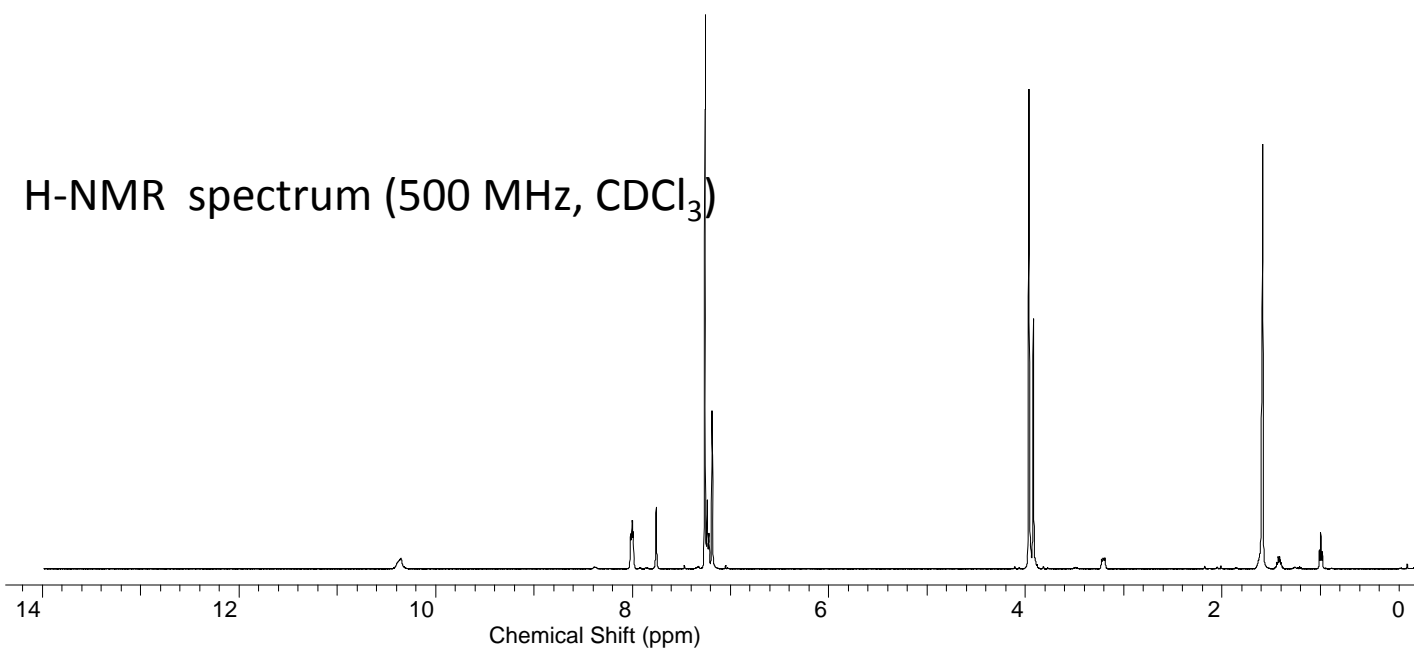

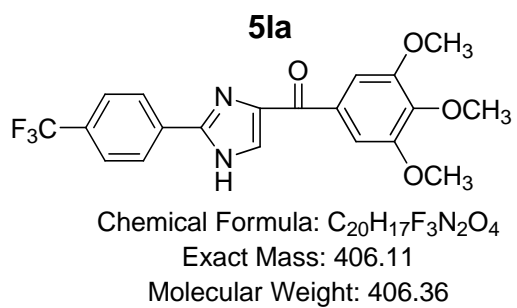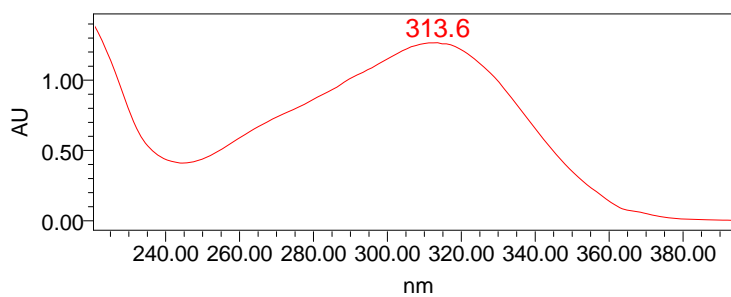

UV spectrum

### HPLC purity determination

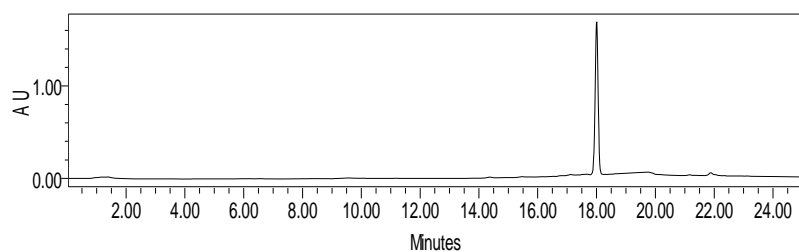

Purity > 99%,  $t_R = 18.00$  min

### H-NMR spectrum (500 MHz, $CDCl_3$ )

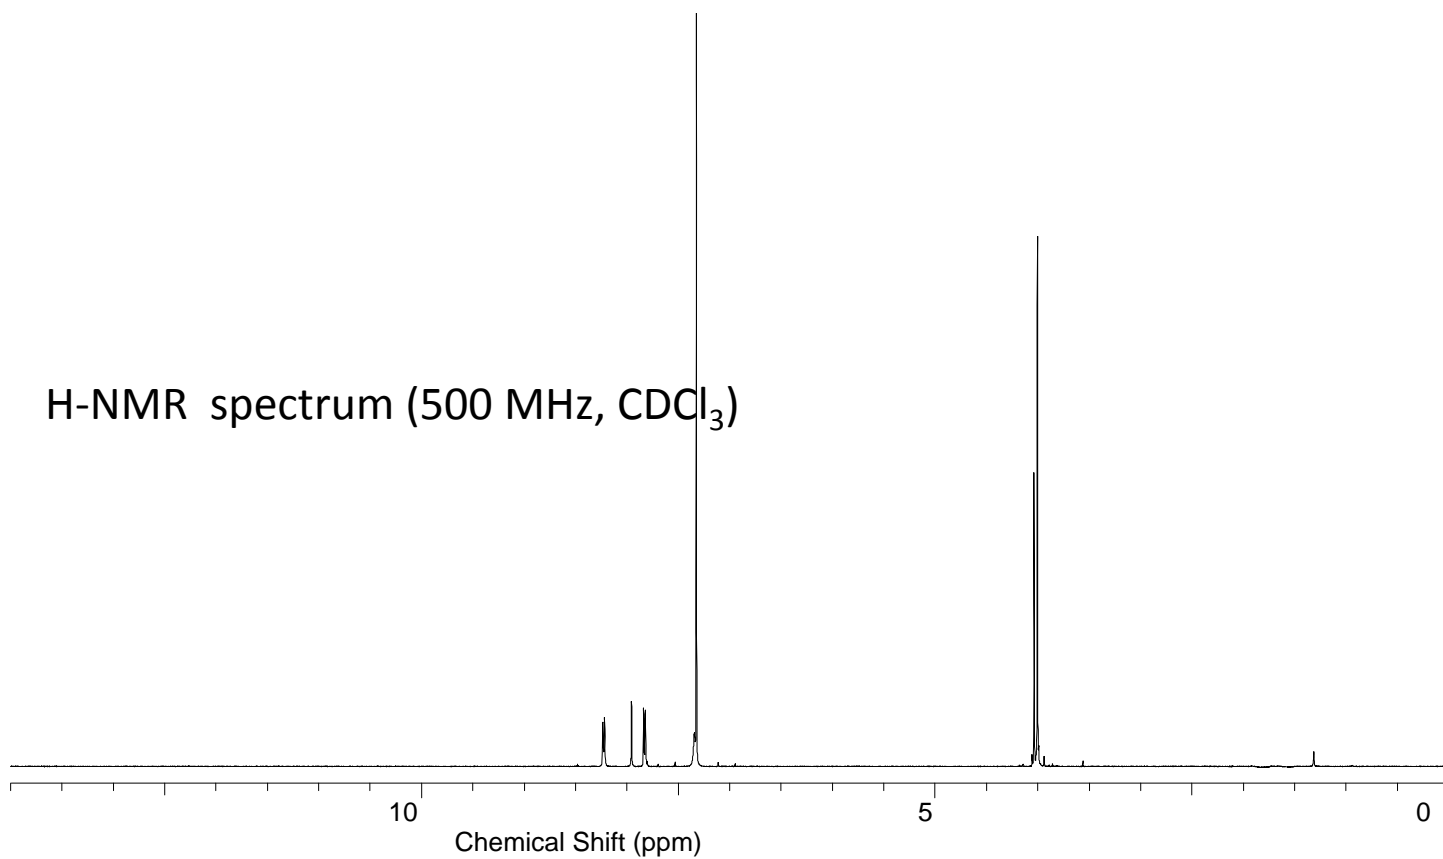

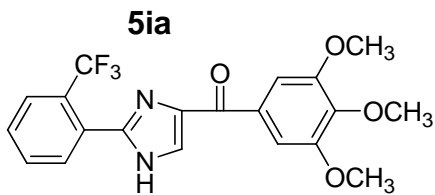

Chemical Formula:  $C_{20}H_{17}F_3N_2O_4$

Exact Mass: 406.11

Molecular Weight: 406.36

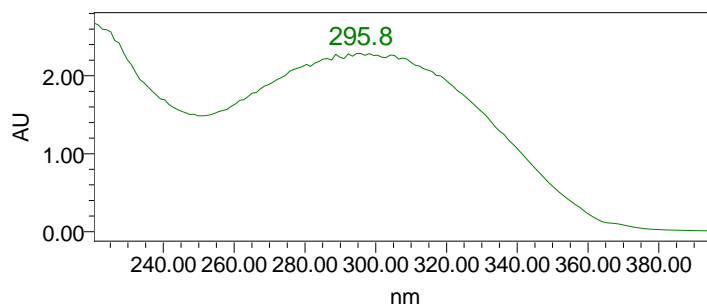

UV spectrum

### HPLC purity determination

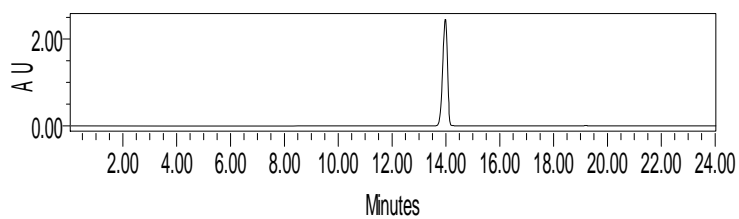

Purity > 99%,  $t_R = 13.98$  min

### H-NMR spectrum (500 MHz, $CDCl_3$ )

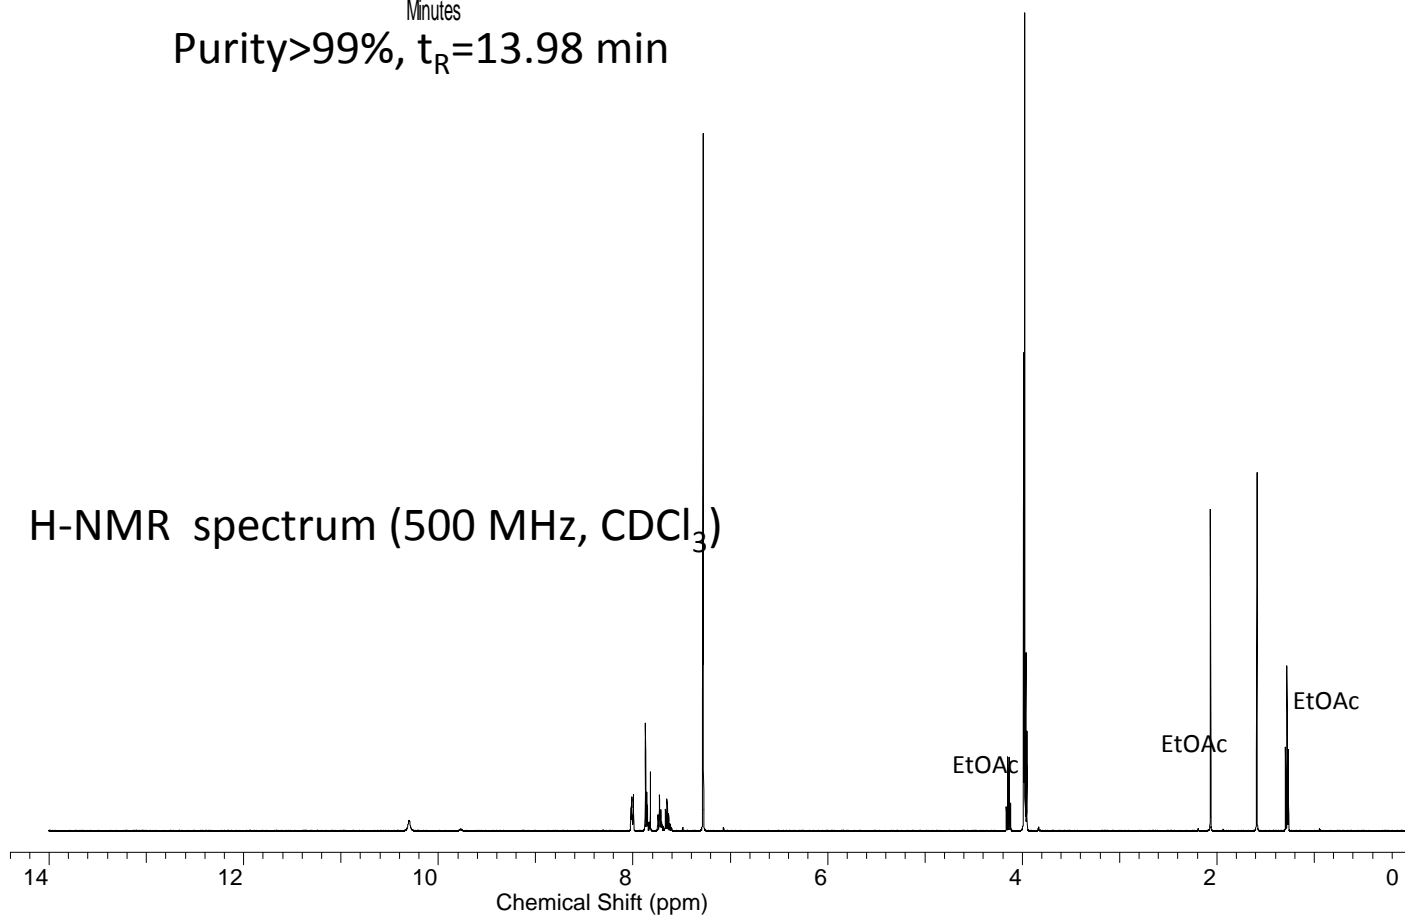

### 5ib

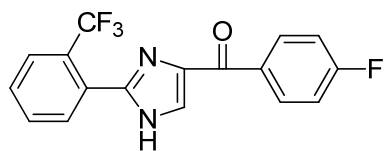

Chemical Formula: C<sub>19</sub>H<sub>17</sub>FN<sub>2</sub>O<sub>4</sub>

Exact Mass: 356.12

Molecular Weight: 356.35

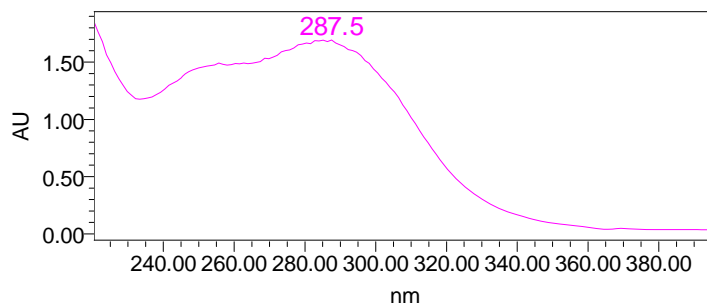

UV spectrum

### HPLC purity determination

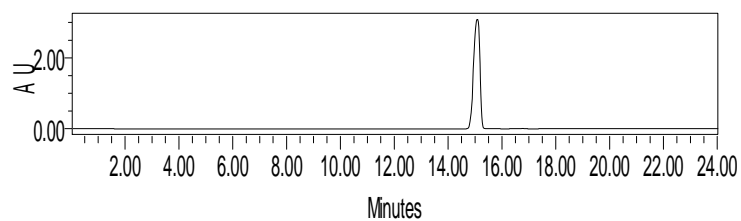

Purity > 99%, t<sub>R</sub> = 15.10 min

### H-NMR spectrum (500 MHz, CDCl<sub>3</sub>)

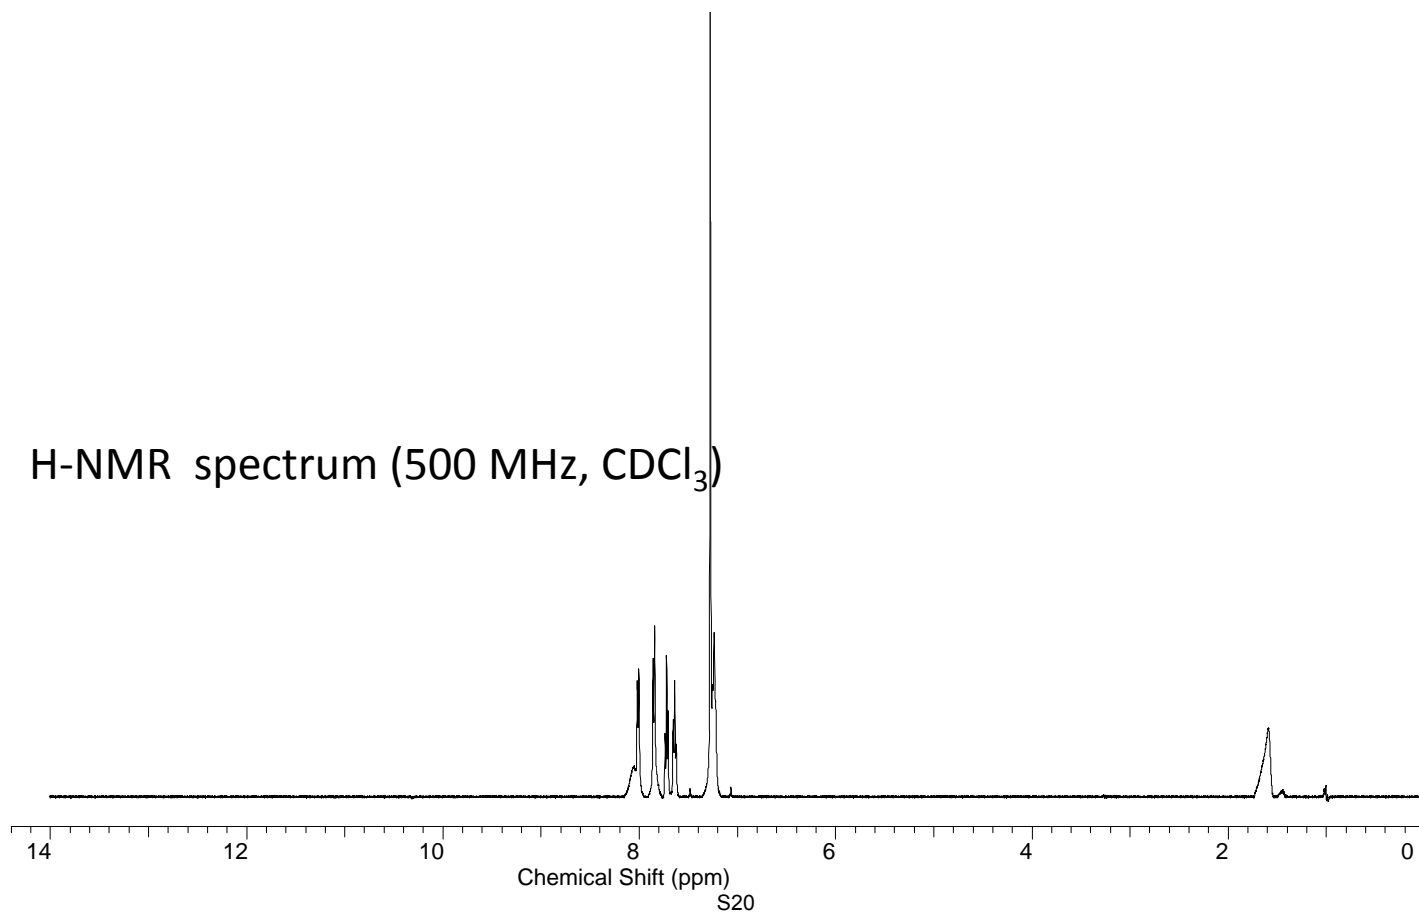

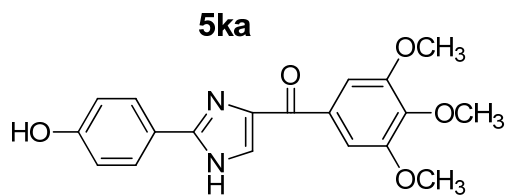

Chemical Formula:  $C_{19}H_{18}N_2O_5$

Exact Mass: 354.12

Molecular Weight: 354.36

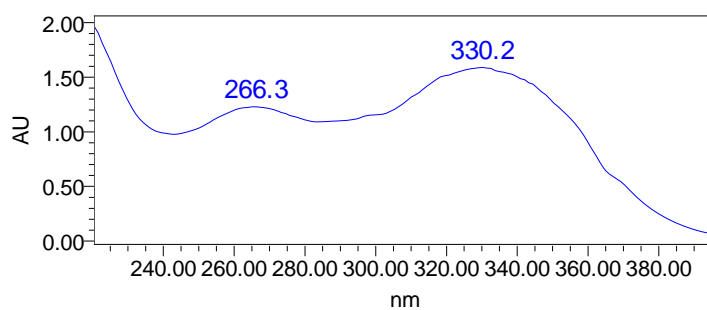

UV spectrum

### HPLC purity determination

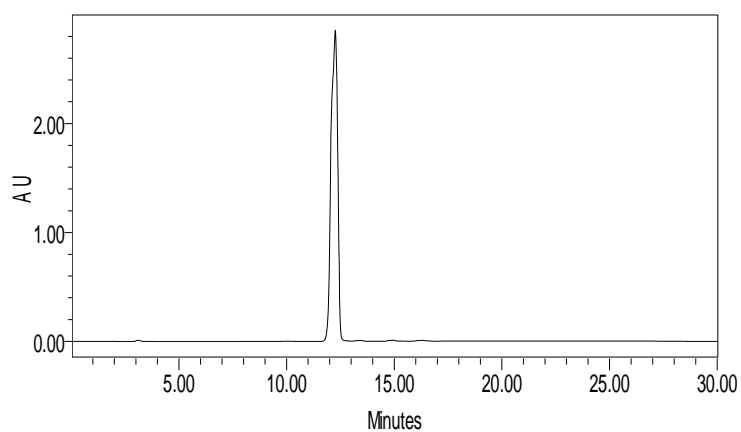

Purity=98.7%,  $t_R$ =12.25 min

### H-NMR spectrum (500 MHz, $CD_3OD$ )

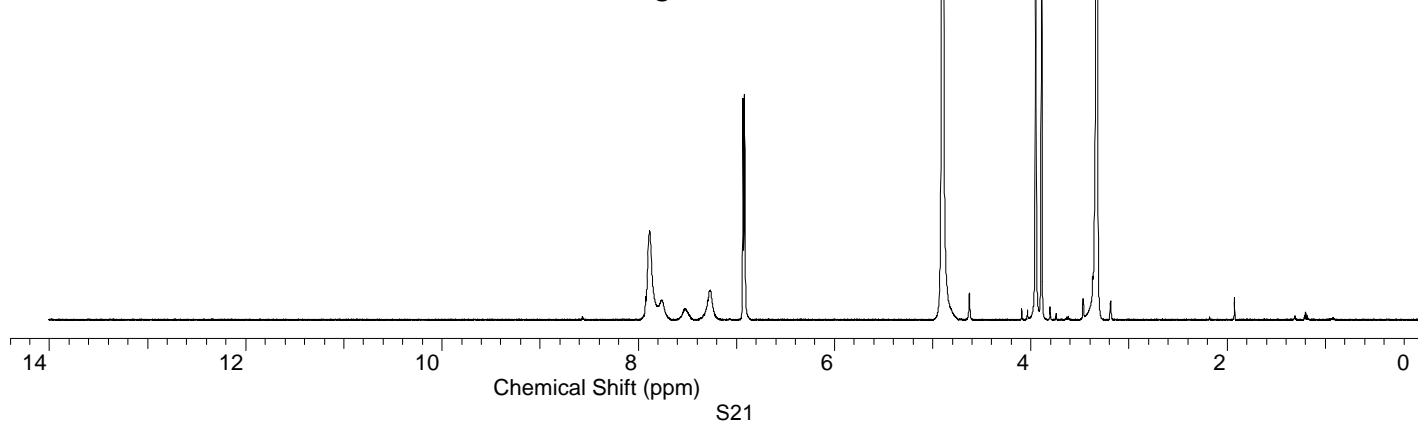

**5kb**

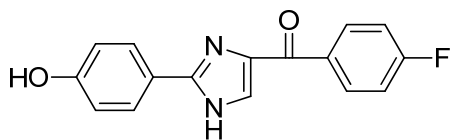

Chemical Formula:  $C_{16}H_{11}FN_2O_2$

Exact Mass: 282.08

Molecular Weight: 282.27

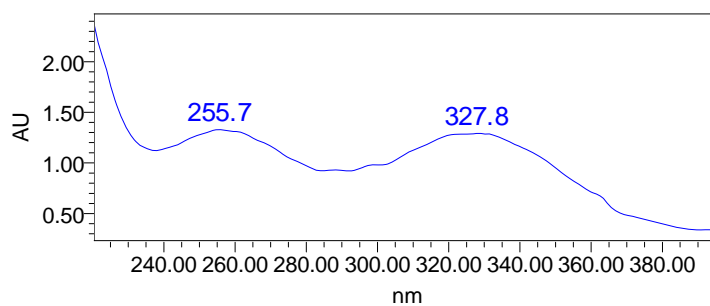

UV spectrum

### HPLC purity determination

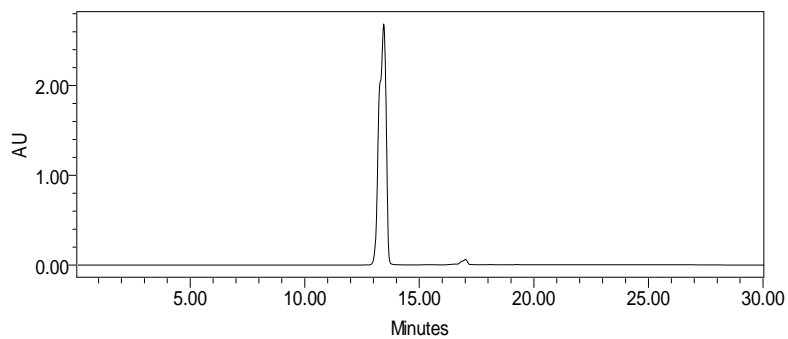

Purity=97.65%,  $t_R$ =13.46 min

### H-NMR spectrum (500 MHz, $CD_3OD$ )

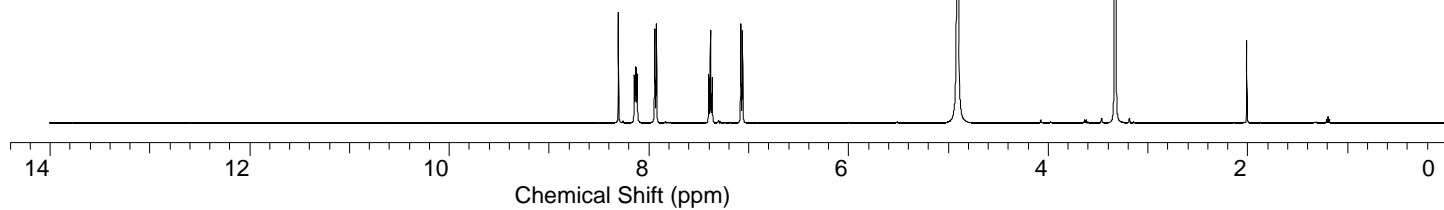

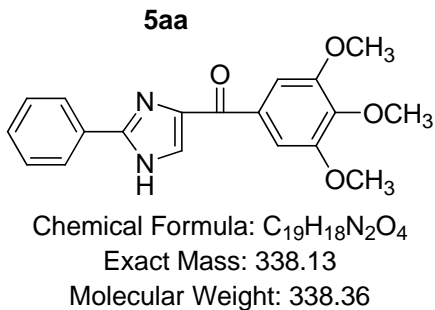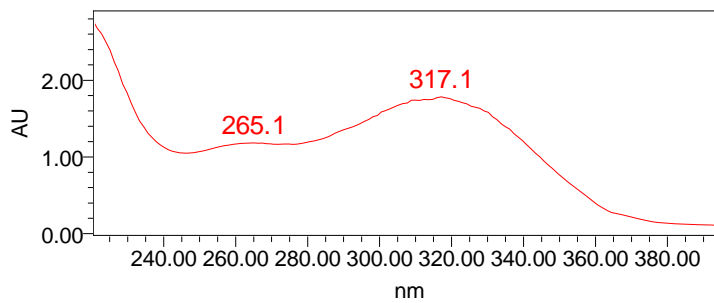

UV spectrum

### HPLC purity determination

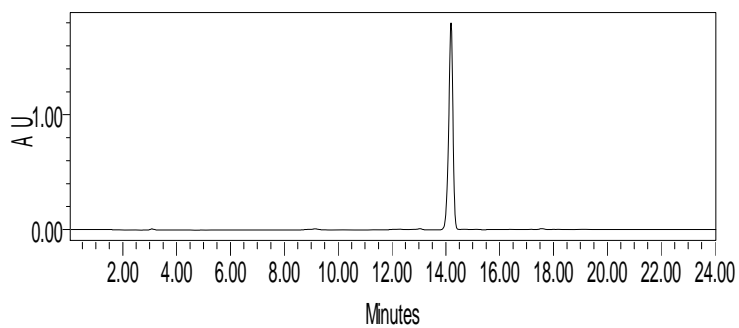

Purity=96.3%,  $t_R$ =14.19 min

### H-NMR spectrum (500 MHz, CDCl<sub>3</sub>)

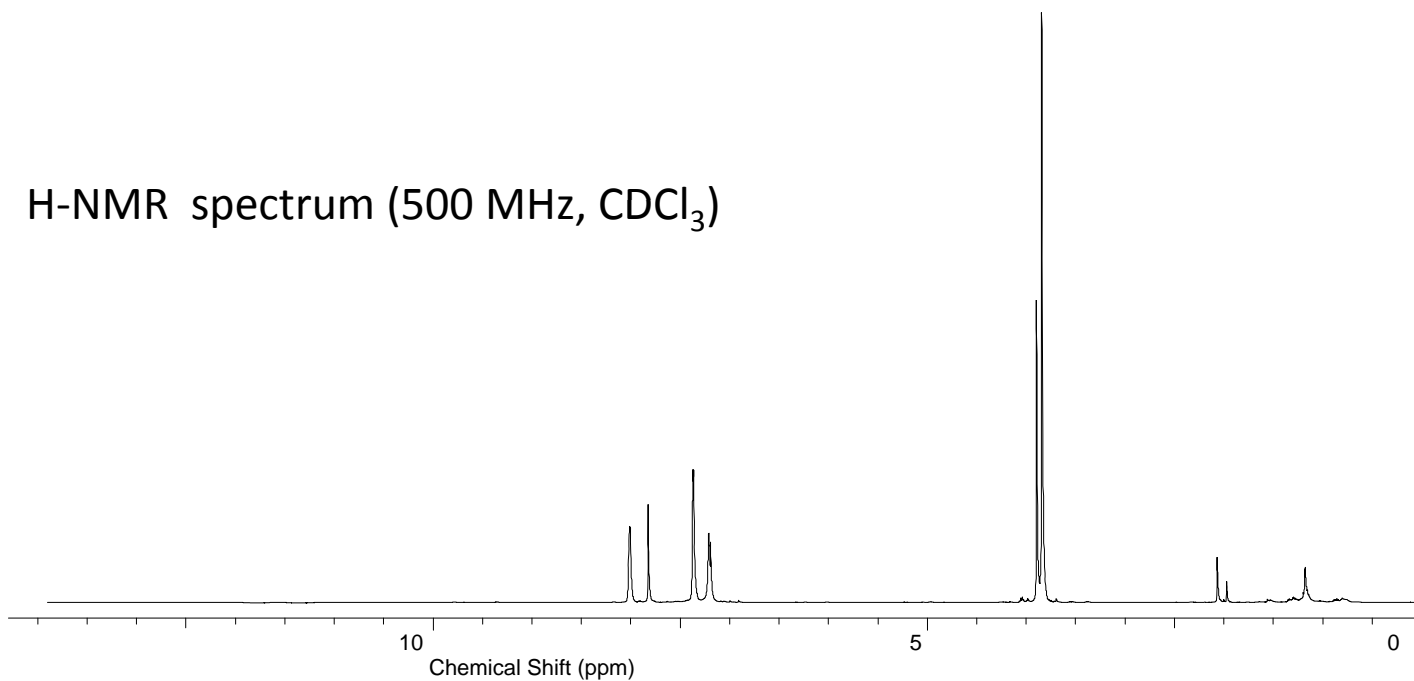

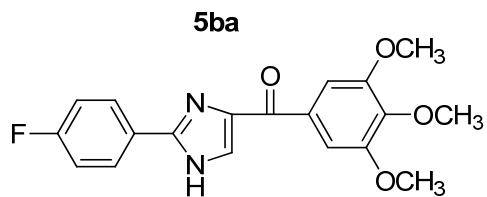

Chemical Formula: C<sub>19</sub>H<sub>17</sub>FN<sub>2</sub>O<sub>4</sub>

Exact Mass: 356.12

Molecular Weight: 356.35

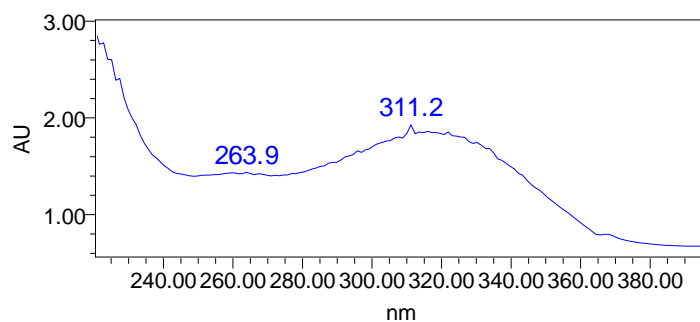

UV spectrum

### HPLC purity determination

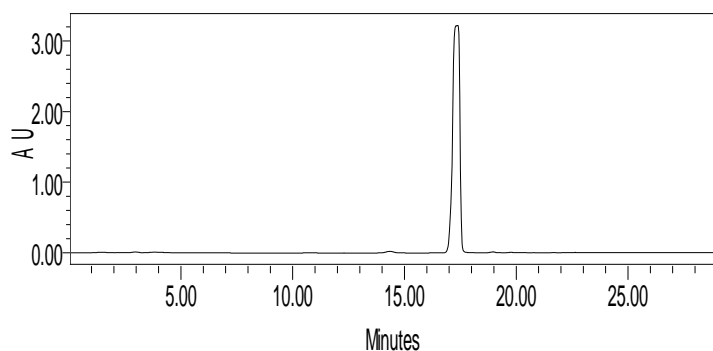

Purity > 99%,  $t_R = 17.23$  min

### H-NMR spectrum (500 MHz, CDCl<sub>3</sub>)

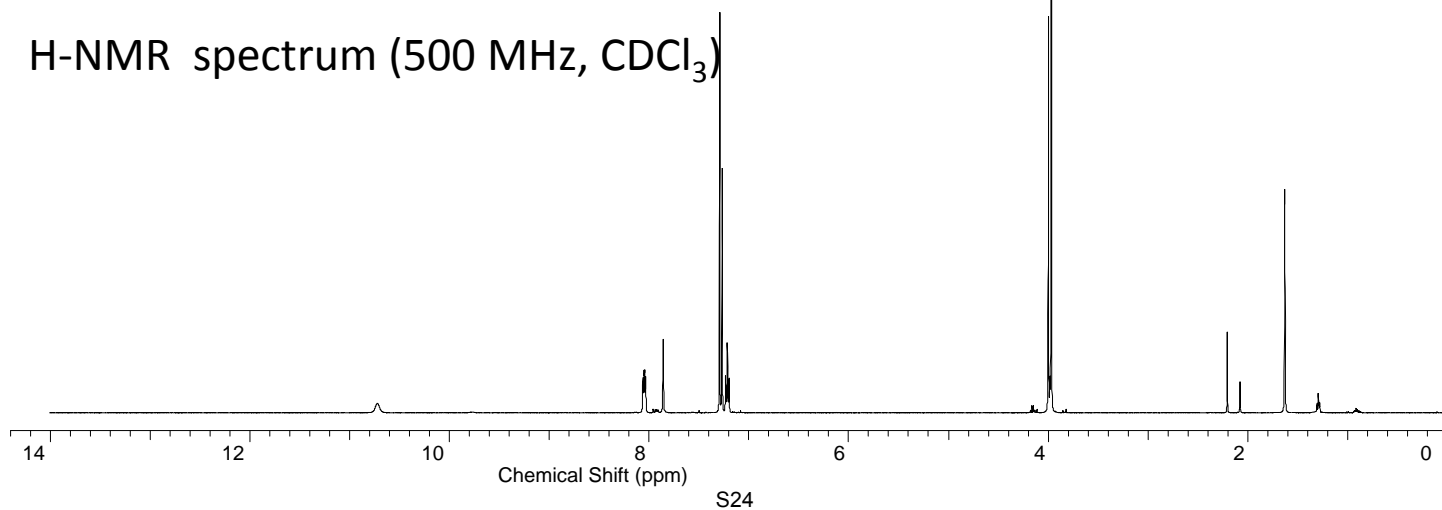



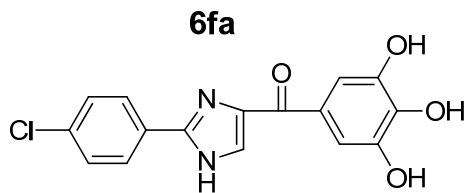

Chemical Formula:  $C_{16}H_{11}ClN_2O_4$

Exact Mass: 330.04

Molecular Weight: 330.72

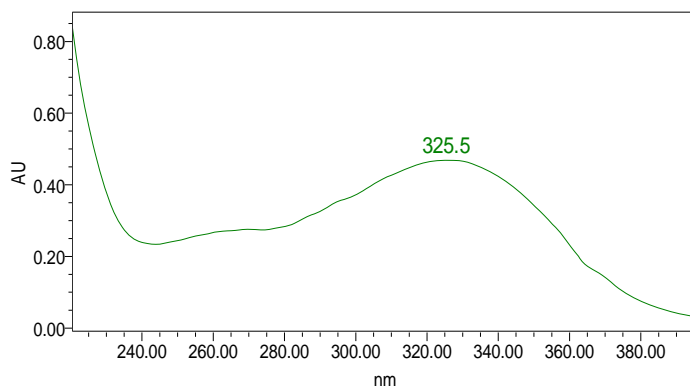

UV spectrum

### HPLC purity determination

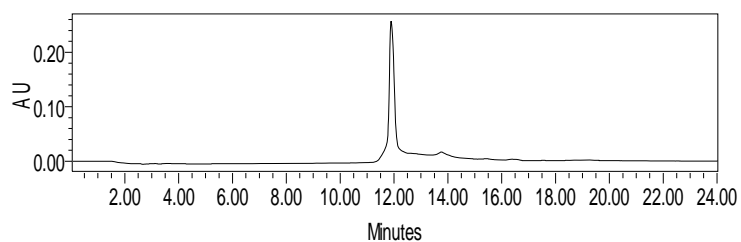

Purity=95.6%,  $t_R$ =11.9 min

### H-NMR spectrum (500 MHz, $CD_3OD$ )

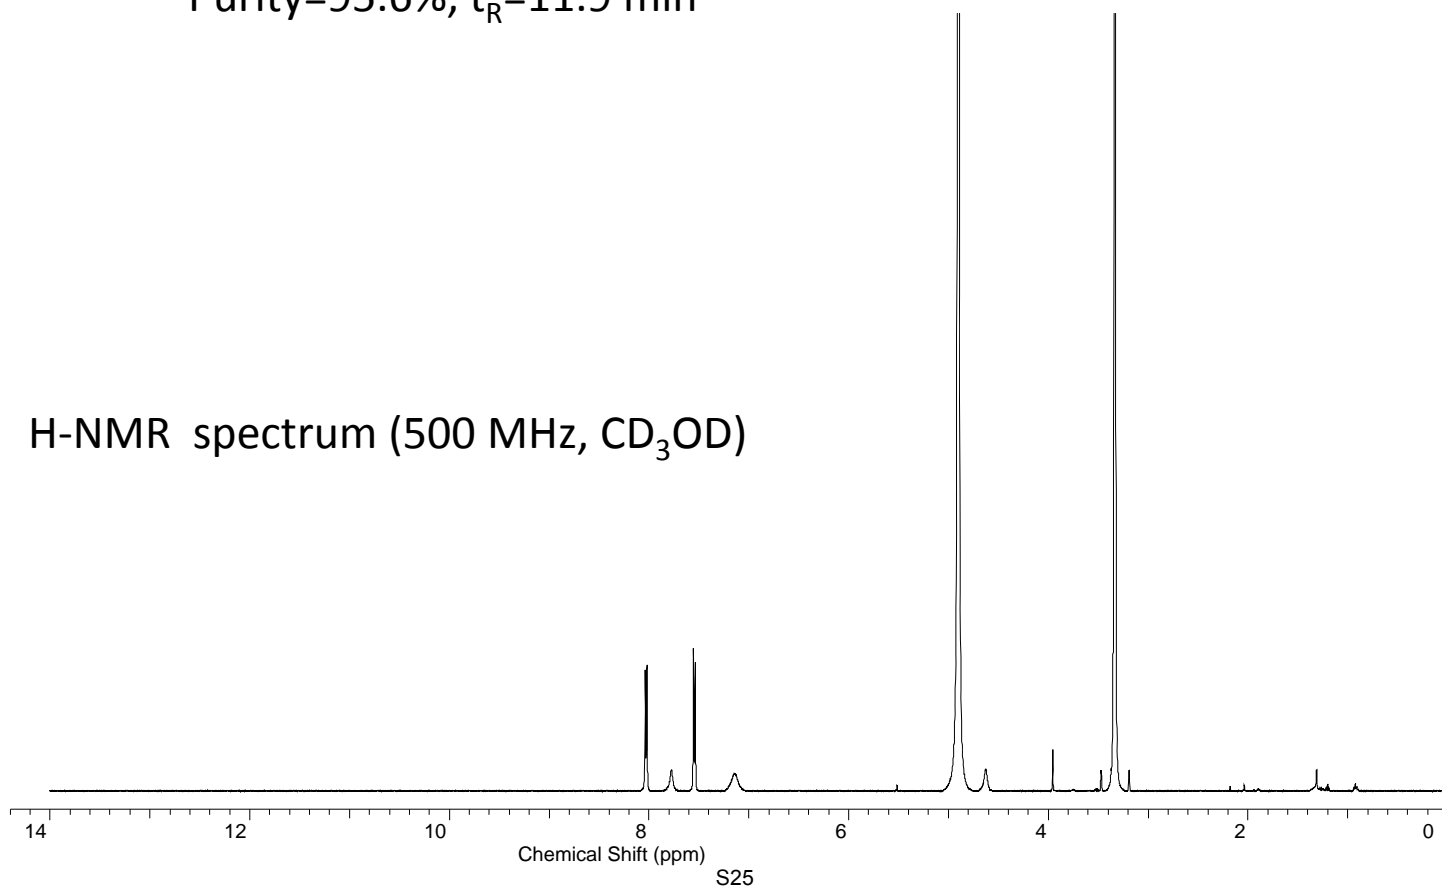

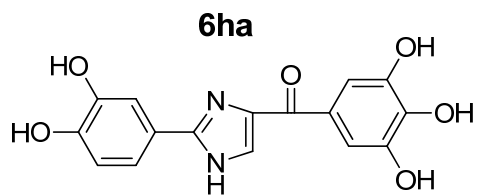

Chemical Formula:  $C_{16}H_{12}N_2O_6$   
Exact Mass: 328.07  
Molecular Weight: 328.28

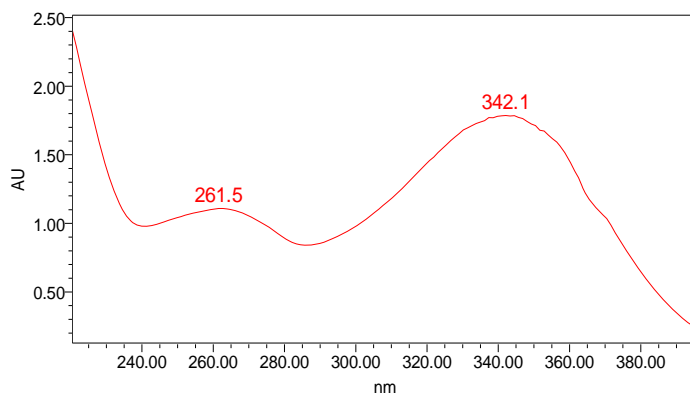

UV spectrum

### HPLC purity determination

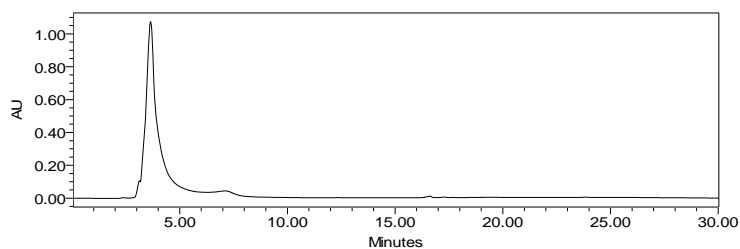

Purity=97.9%,  $t_R$ =3.64 min

### H-NMR spectrum (500 MHz, $CD_3OD$ )

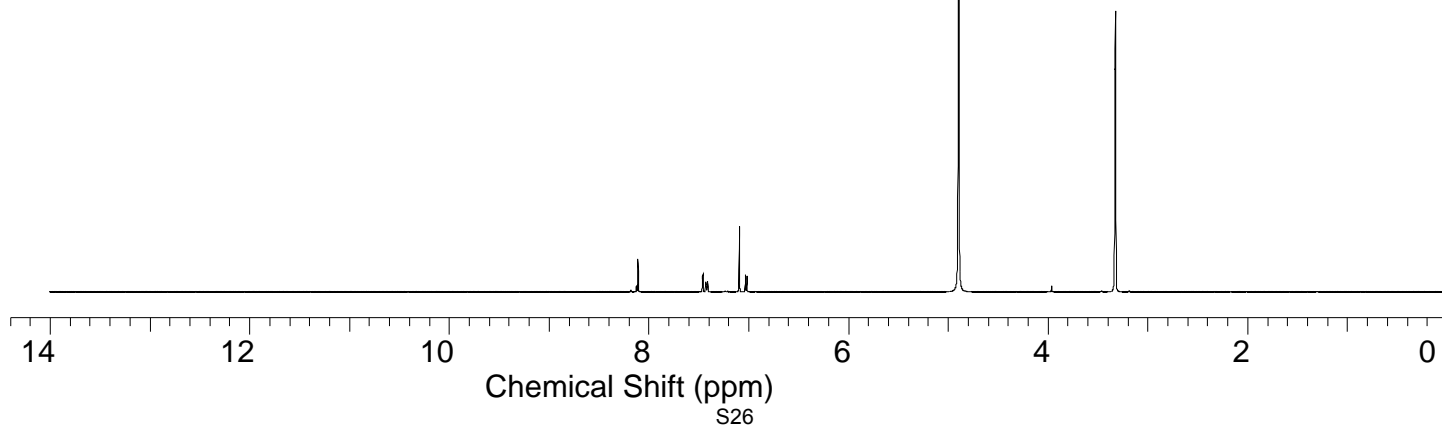

**5ab**

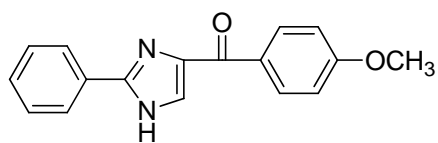

Chemical Formula:  $C_{17}H_{14}N_2O_2$

Exact Mass: 278.11

Molecular Weight: 278.31

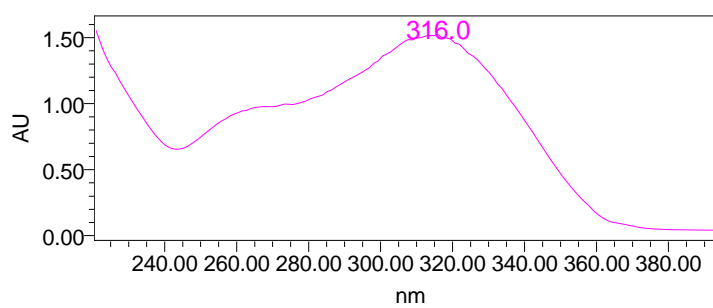

UV spectrum

### HPLC purity determination

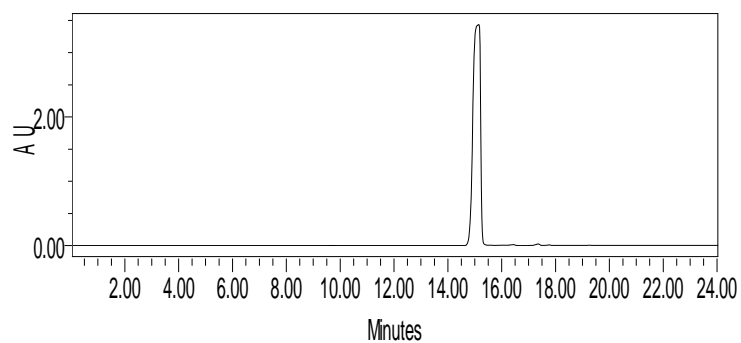

Purity > 99%,  $t_R = 15.14$  min

### H-NMR spectrum (500 MHz, $CDCl_3$ )

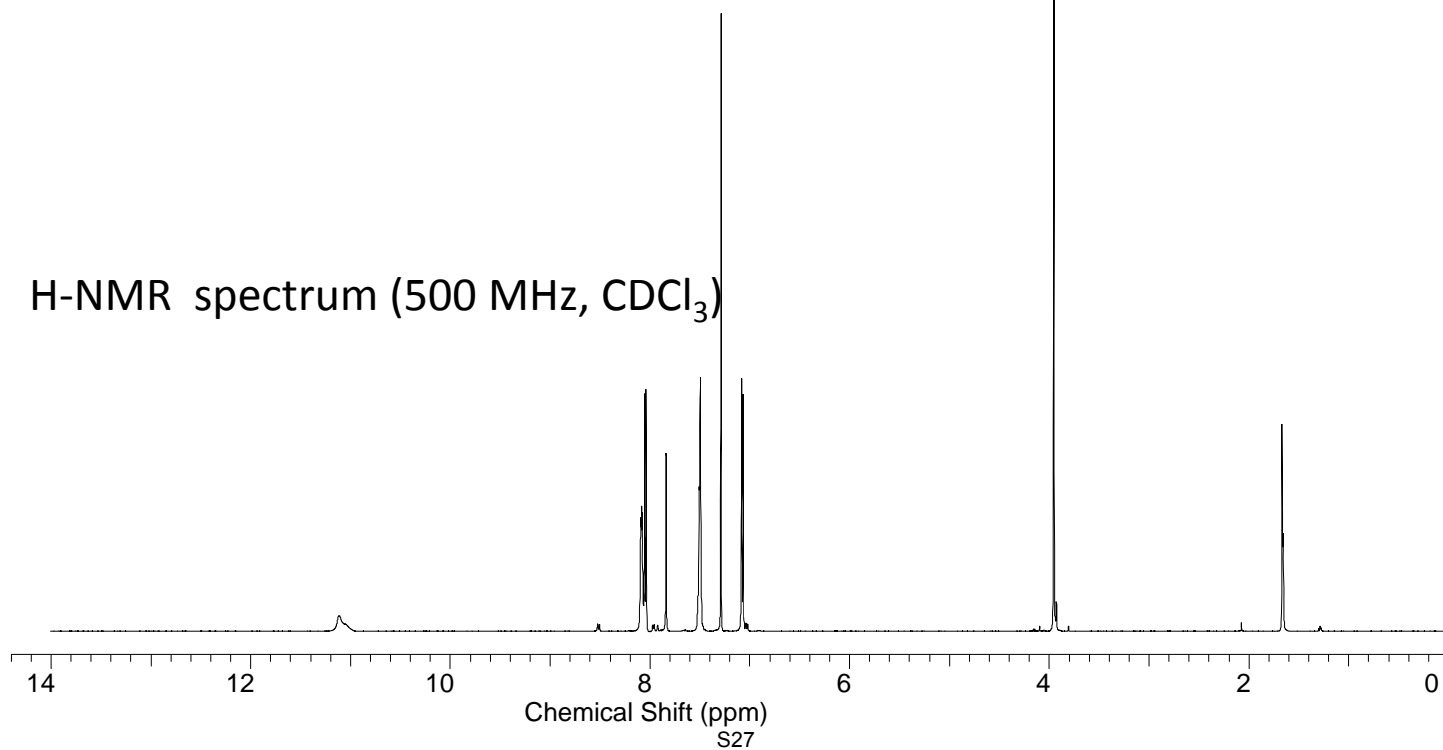

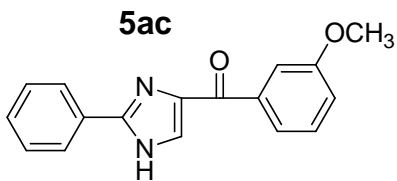

Chemical Formula: C<sub>17</sub>H<sub>14</sub>N<sub>2</sub>O<sub>2</sub>

Exact Mass: 278.11

Molecular Weight: 278.31

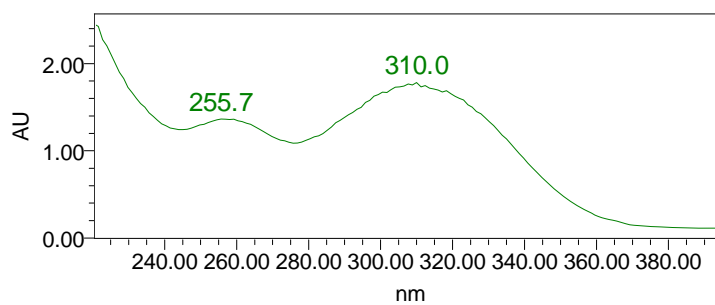

UV spectrum

### HPLC purity determination

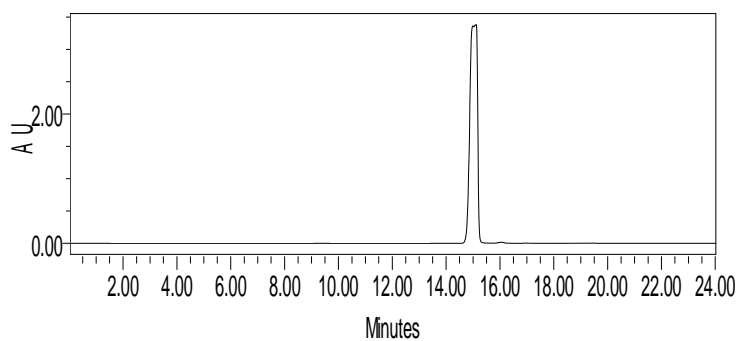

Purity > 99%,  $t_R = 15.07$  min

### H-NMR spectrum (500 MHz, CDCl<sub>3</sub>)

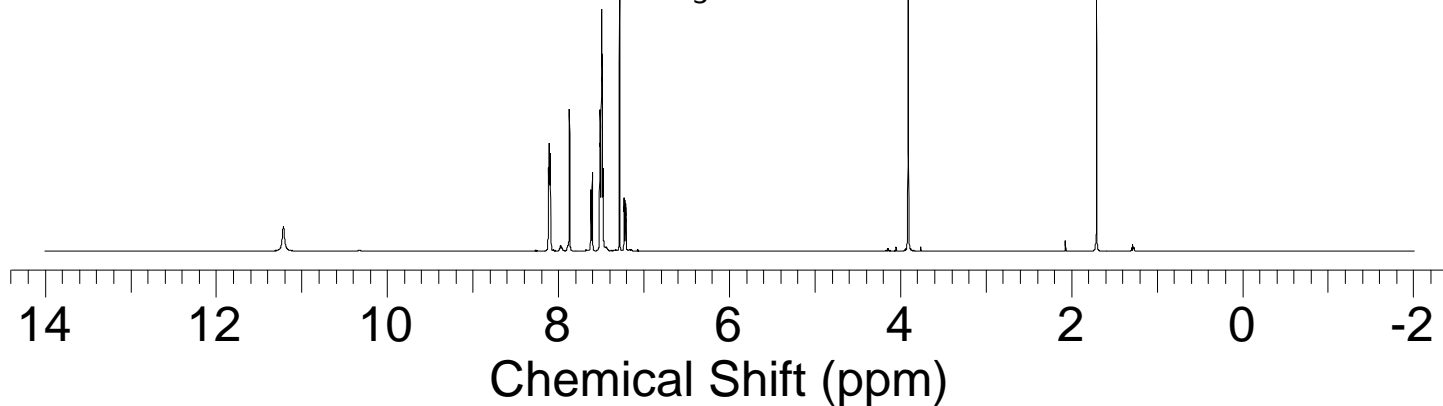

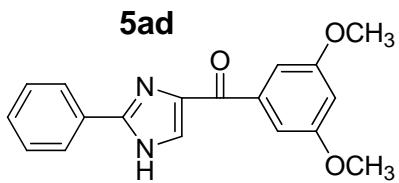

Chemical Formula: C<sub>18</sub>H<sub>16</sub>N<sub>2</sub>O<sub>3</sub>

Exact Mass: 308.12

Molecular Weight: 308.33

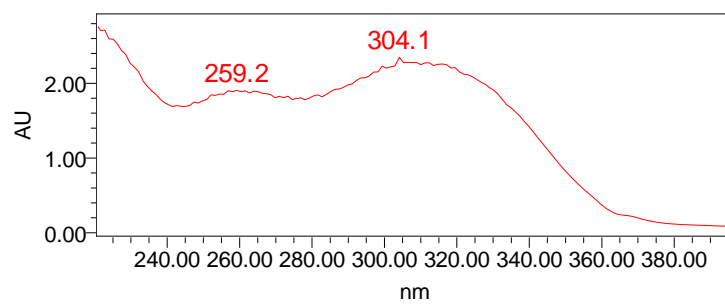

UV spectrum

### HPLC purity determination

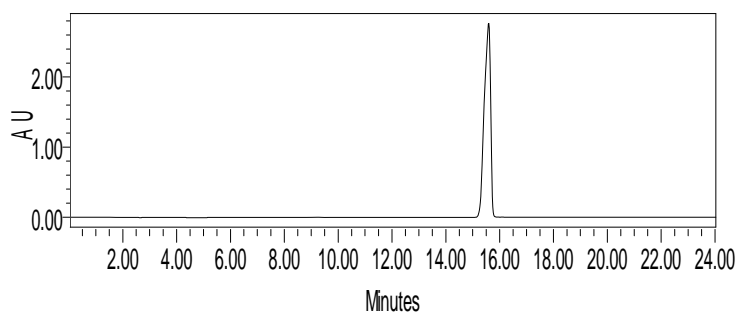

Purity > 99%,  $t_R = 15.59$  min

### H-NMR spectrum (500 MHz, CDCl<sub>3</sub>)

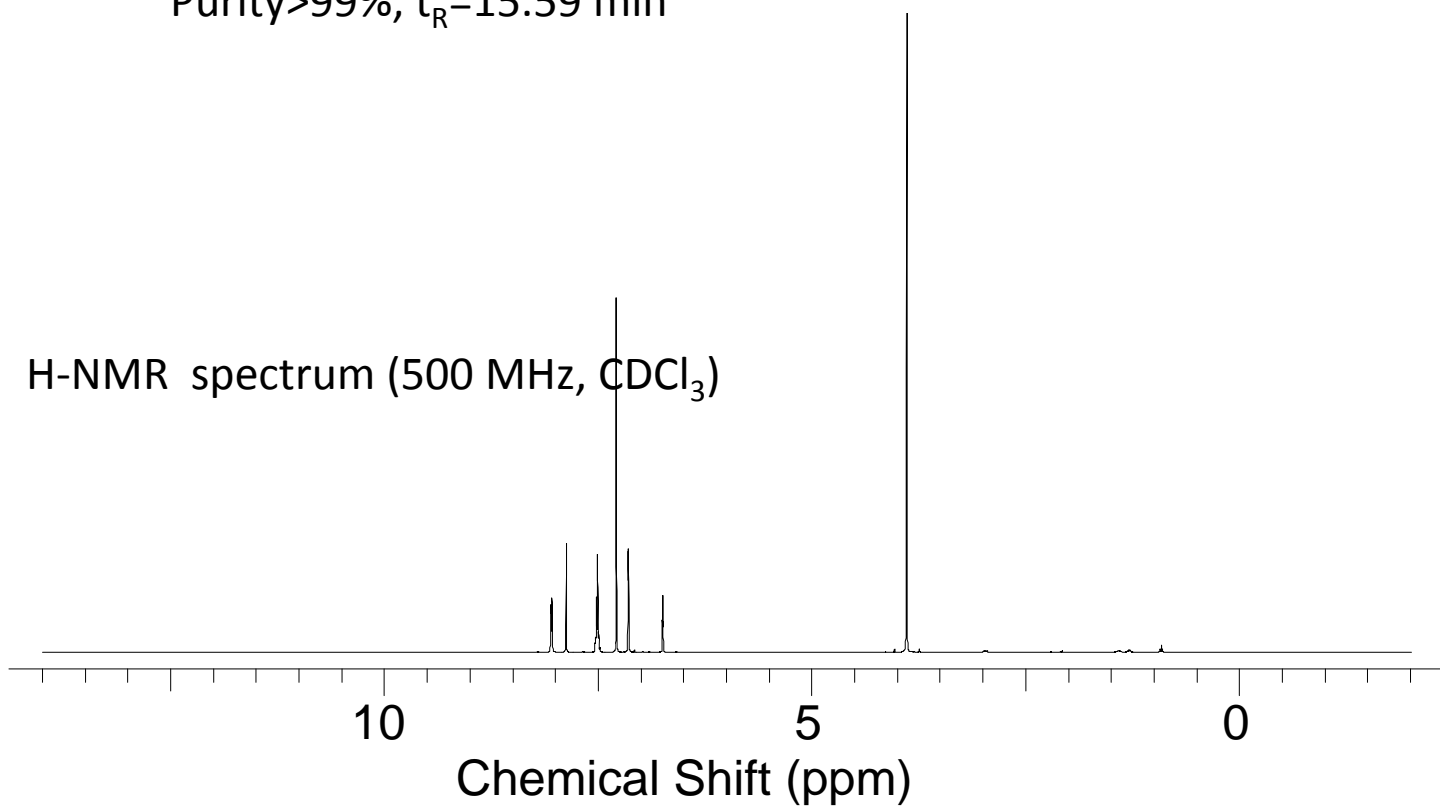

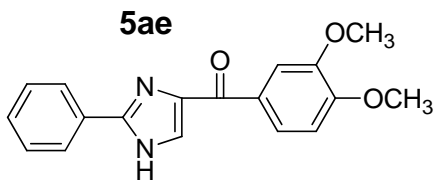

Chemical Formula:  $C_{18}H_{16}N_2O_3$

Exact Mass: 308.12

Molecular Weight: 308.33

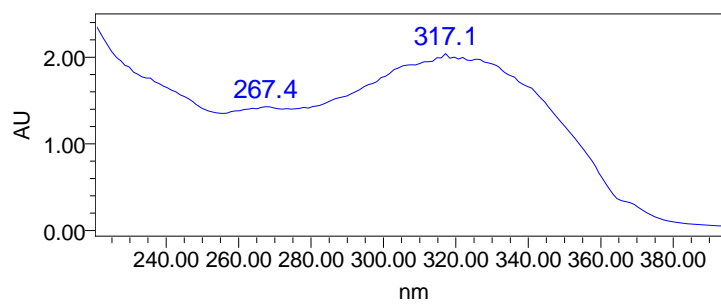

UV spectrum

### HPLC purity determination

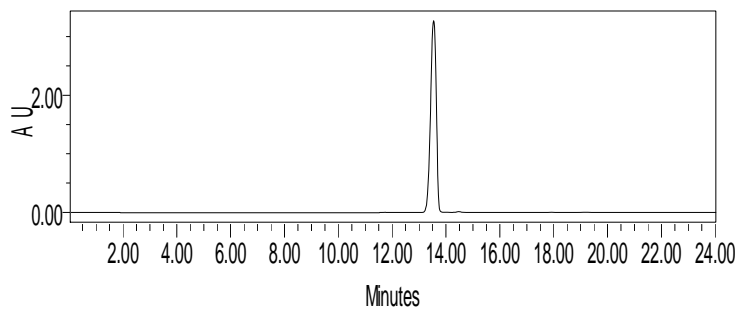

Purity >99%,  $t_R = 13.54$  min

### H-NMR spectrum (500 MHz, $CDCl_3$ )

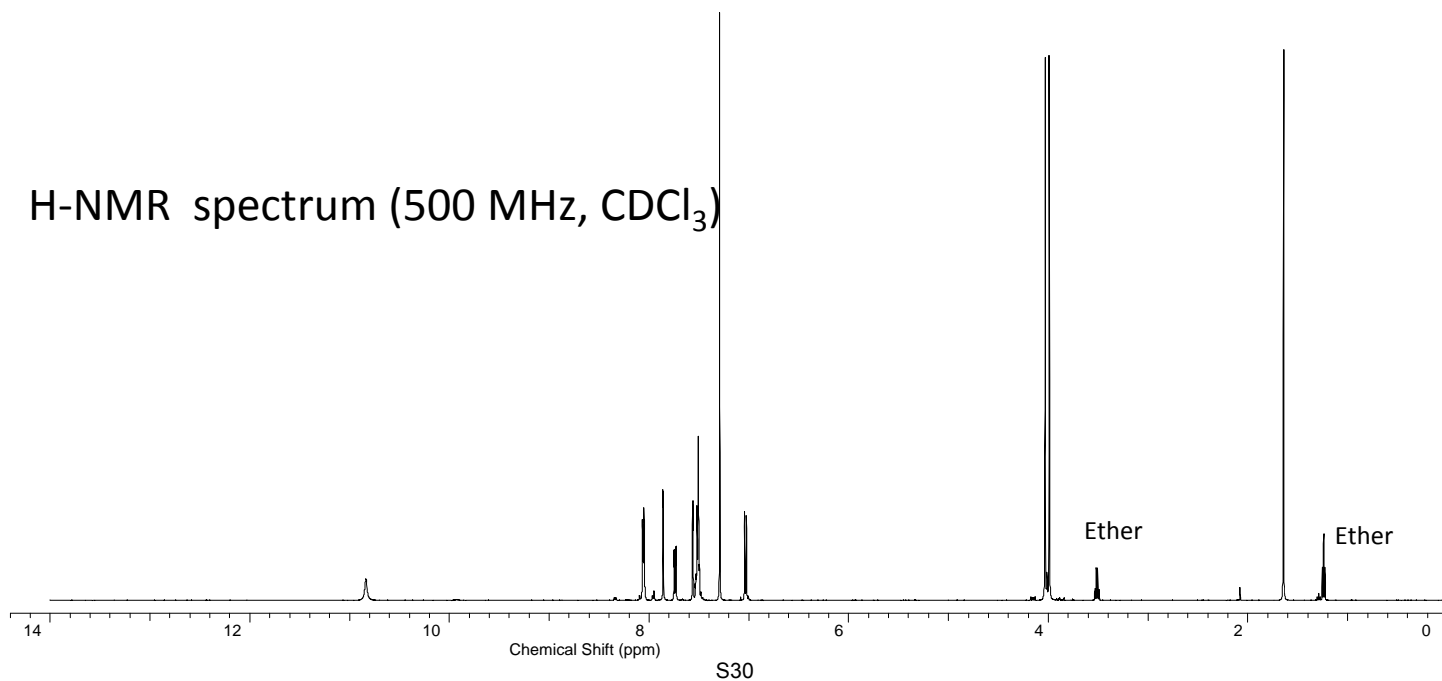

**5af**

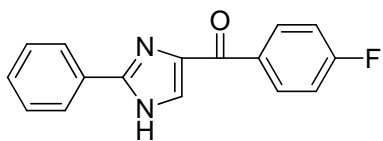

Chemical Formula: C<sub>16</sub>H<sub>11</sub>FN<sub>2</sub>O

Exact Mass: 266.09

Molecular Weight: 266.27

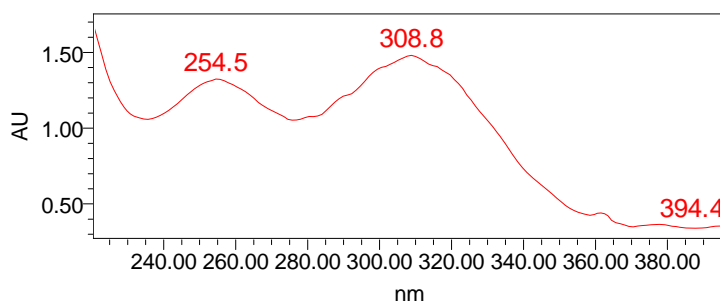

UV spectrum

### HPLC purity determination

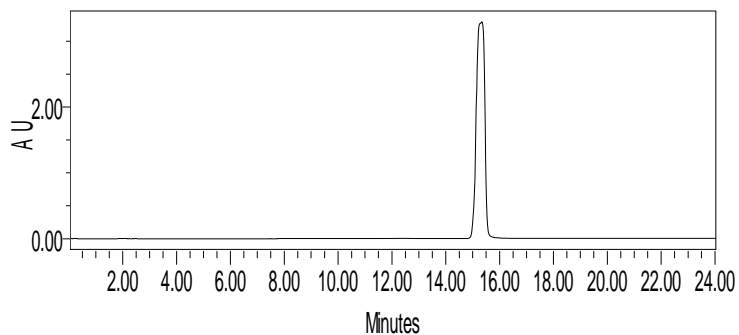

Purity=98.9%,  $t_R$ =15.37 min

### H-NMR spectrum (500 MHz, CDCl<sub>3</sub>)

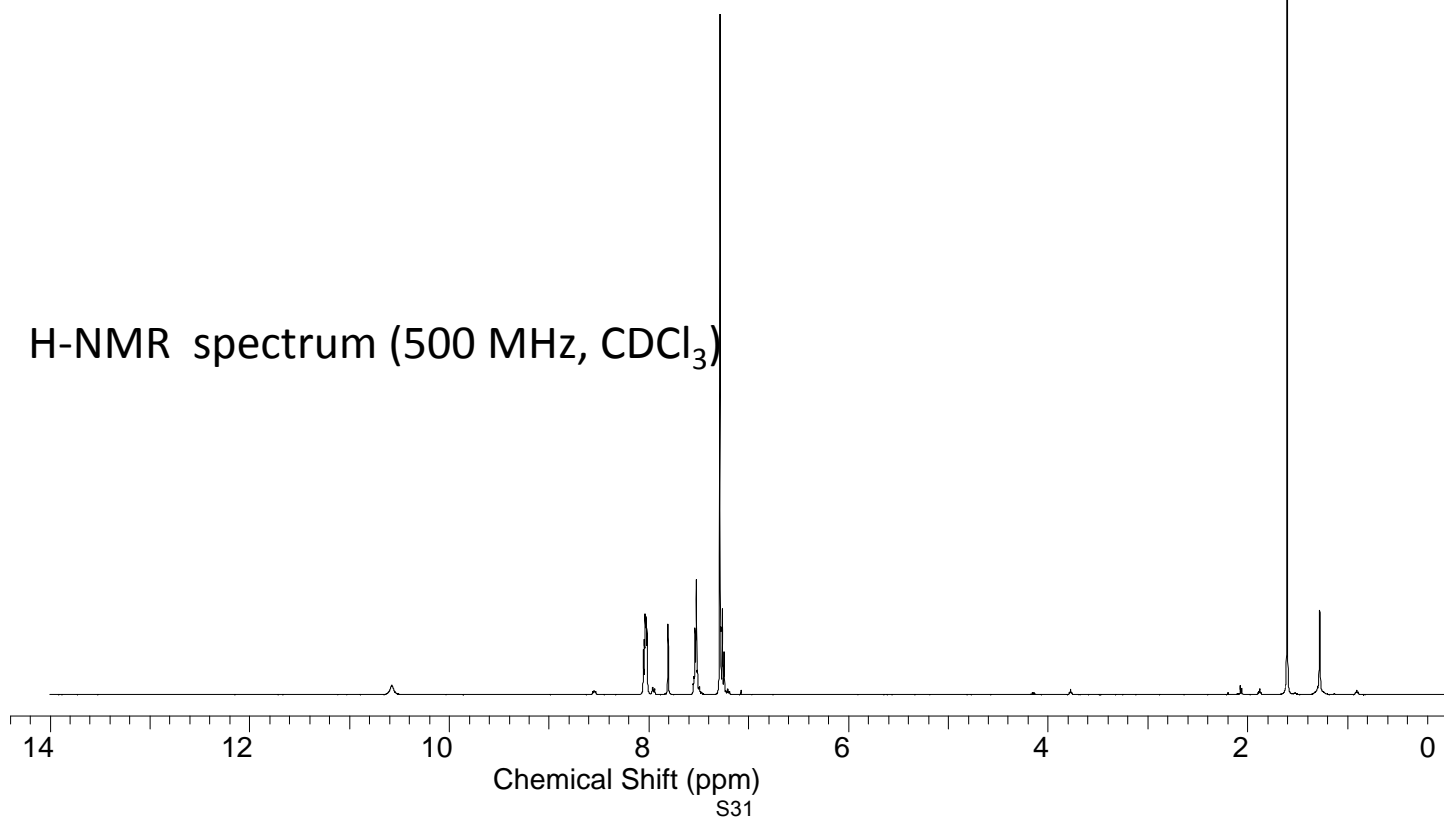

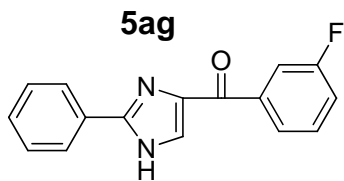

Chemical Formula:  $C_{16}H_{11}FN_2O$

Exact Mass: 266.09

Molecular Weight: 266.27

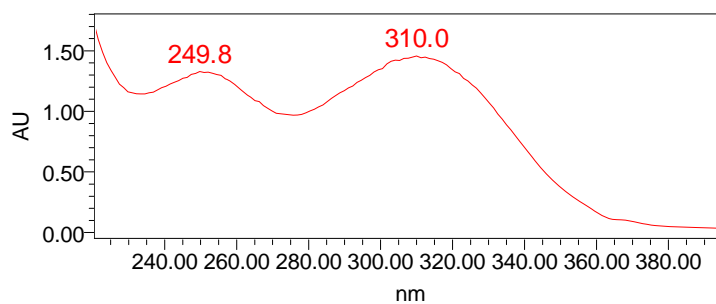

UV spectrum

### HPLC purity determination

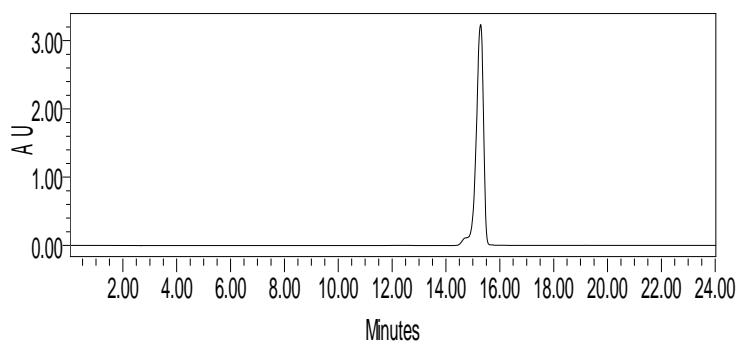

Purity > 99%,  $t_R = 15.29$  min

### H-NMR spectrum (500 MHz, $CDCl_3$ )

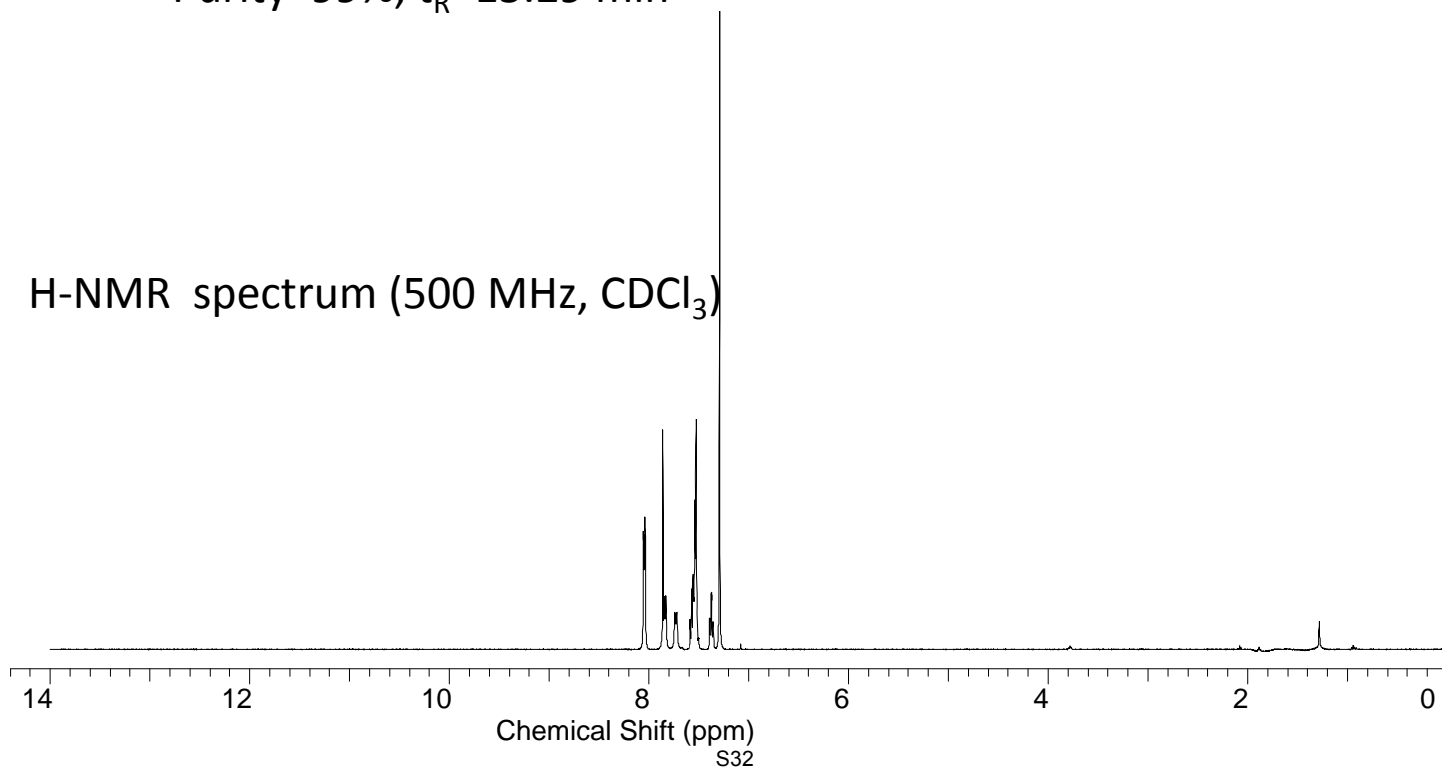



**5ah**

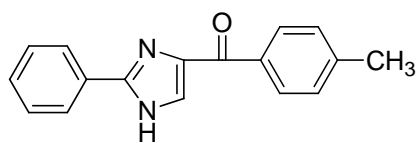

Chemical Formula:  $C_{17}H_{14}N_2O$

Exact Mass: 262.11

Molecular Weight: 262.31

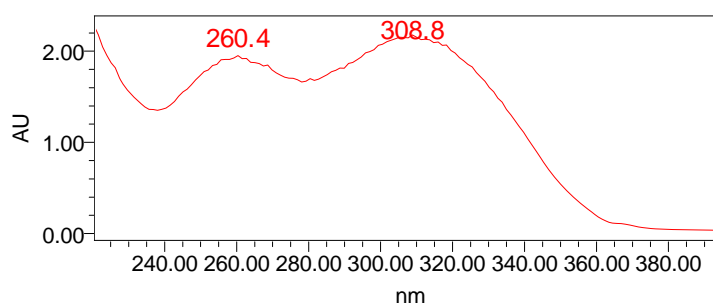

UV spectrum

### HPLC purity determination

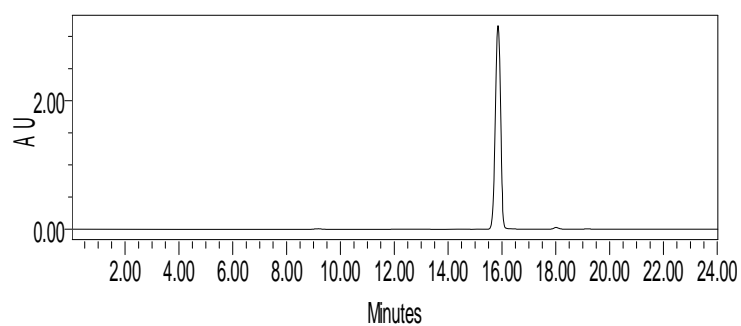

Purity=98.7%,  $t_R$ =15.86 min

### H-NMR spectrum (500 MHz, $CDCl_3$ )

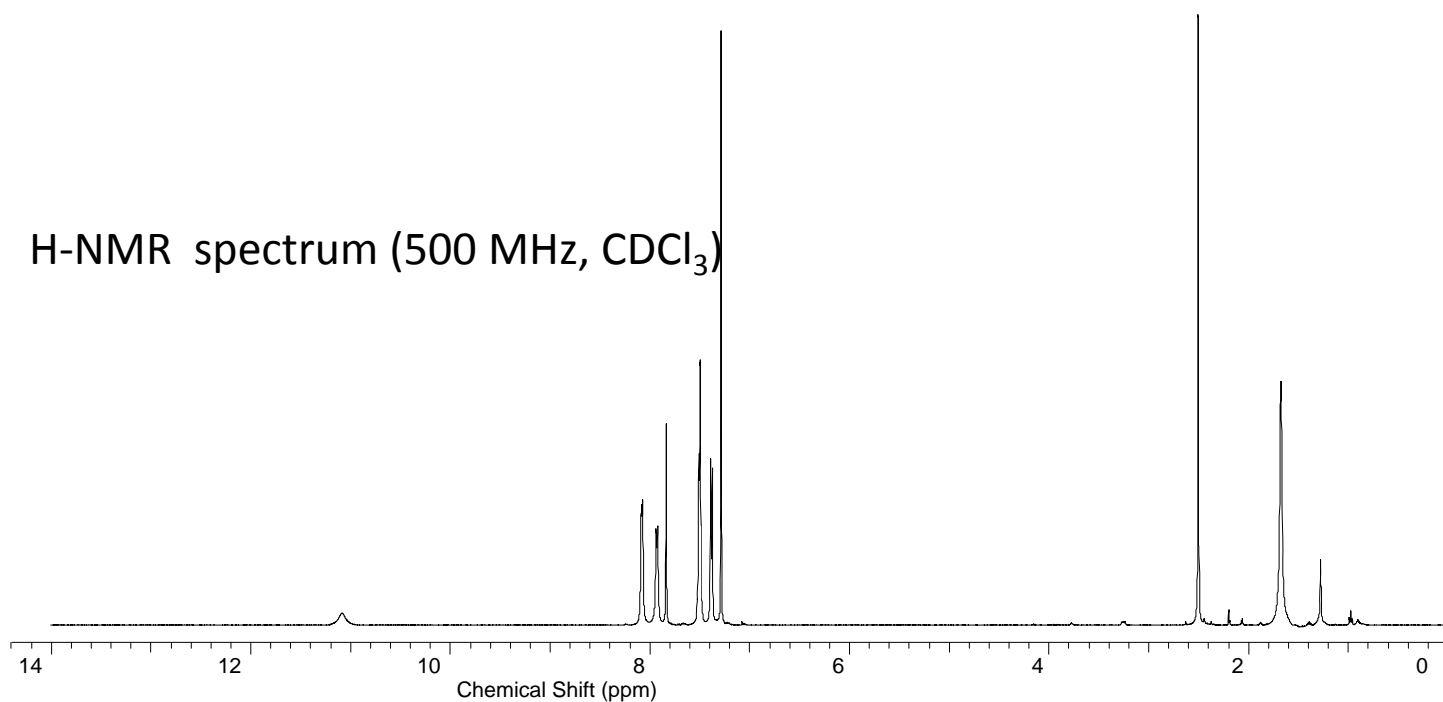

S33

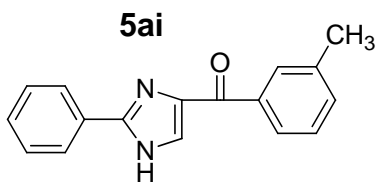

Chemical Formula:  $C_{17}H_{14}N_2O$   
Exact Mass: 262.11  
Molecular Weight: 262.31

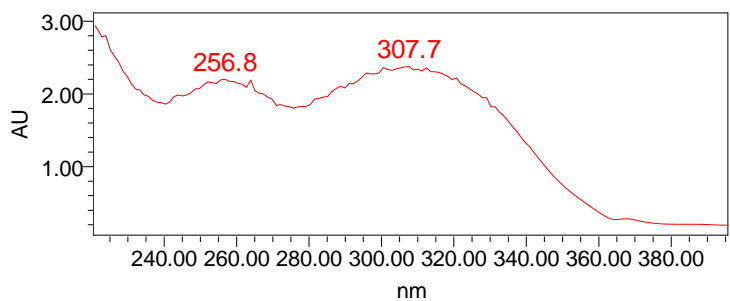

UV spectrum

### HPLC purity determination

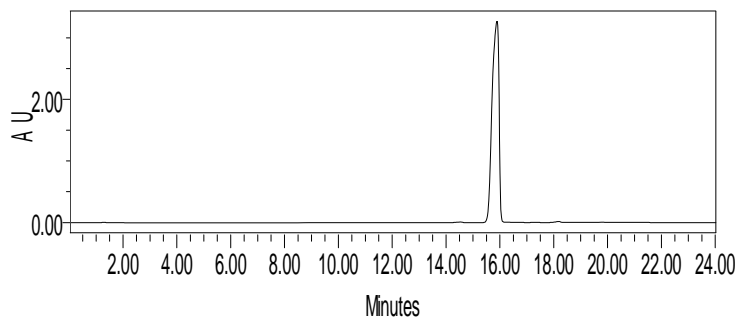

Purity >99%,  $t_R = 15.89$  min

### H-NMR spectrum (500 MHz, $CDCl_3$ )

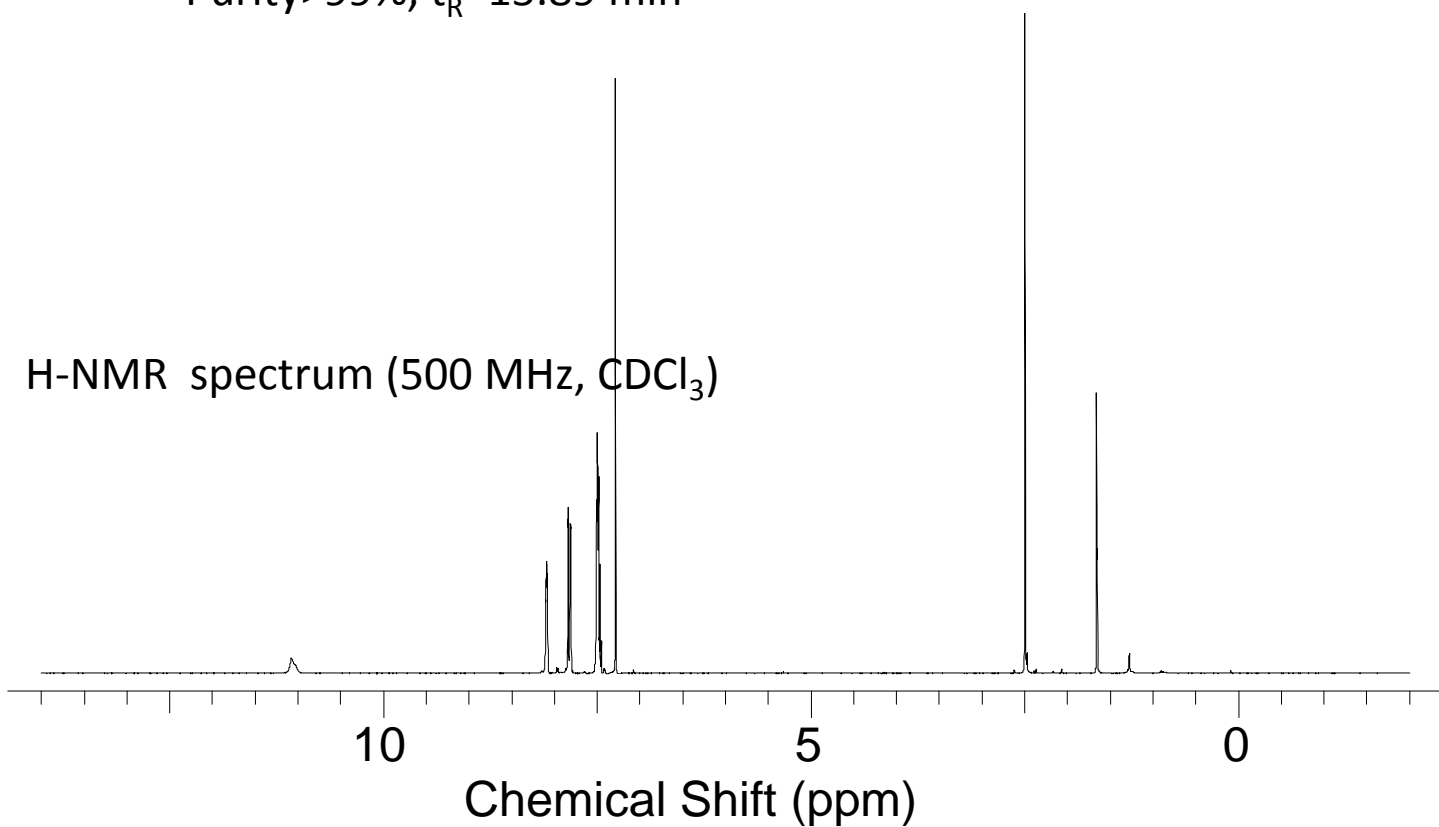

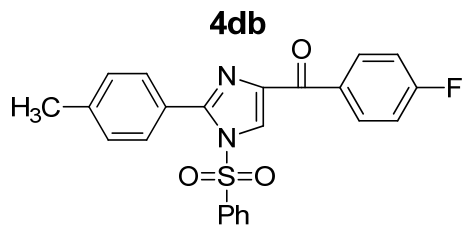

Chemical Formula:  $C_{23}H_{17}FN_2O_3S$

Exact Mass: 420.09

Molecular Weight: 420.46

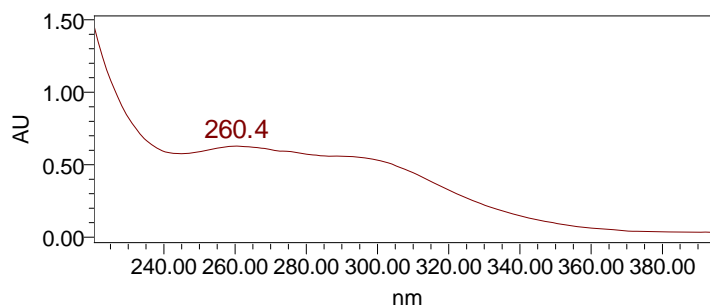

UV spectrum

### HPLC purity determination

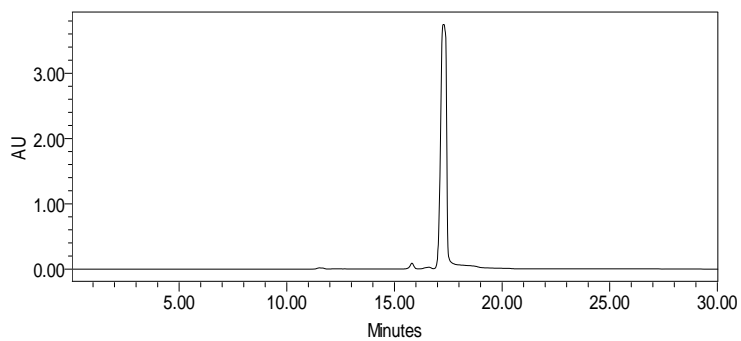

Purity=97.3%,  $t_R$ =17.28 min

### H-NMR spectrum (500 MHz, $CDCl_3$ )

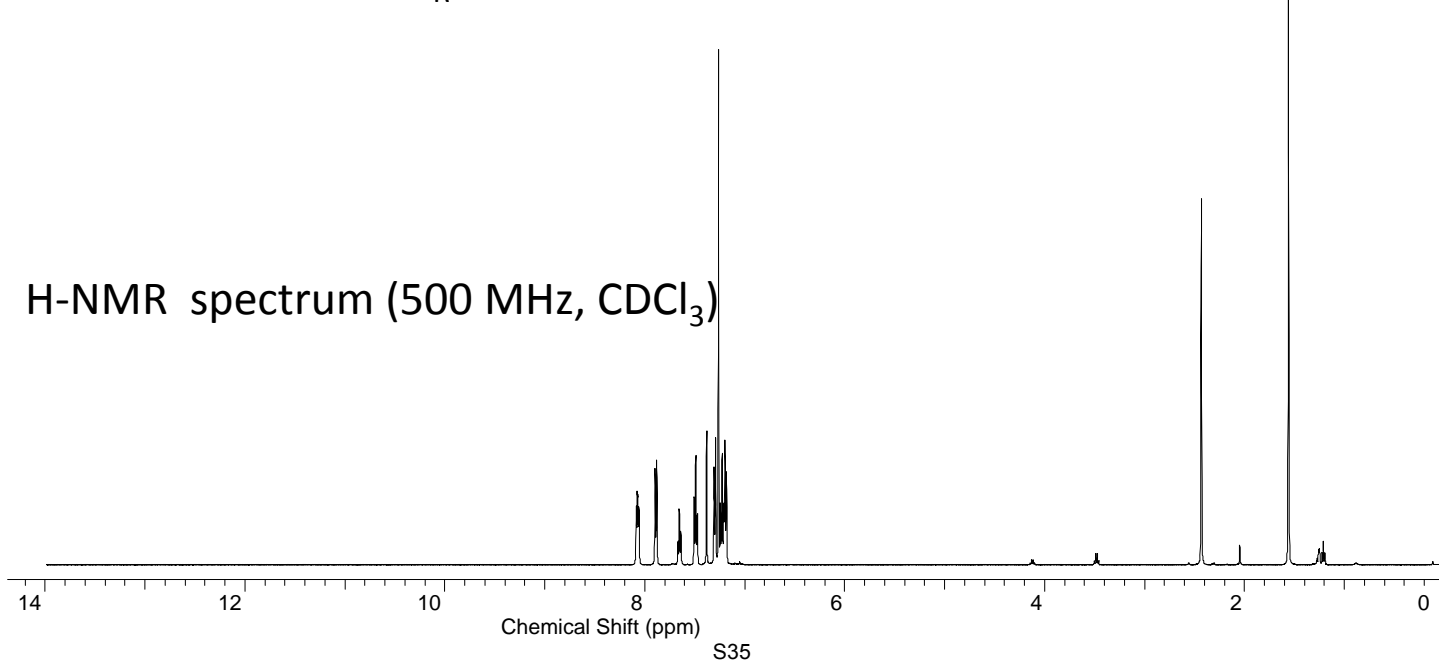

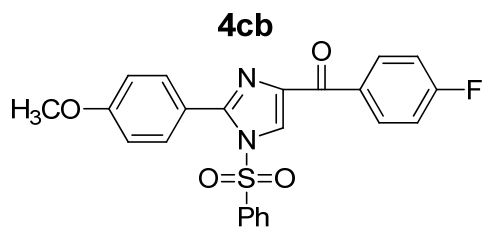

Chemical Formula:  $C_{23}H_{17}FN_2O_4S$

Exact Mass: 436.09

Molecular Weight: 436.46

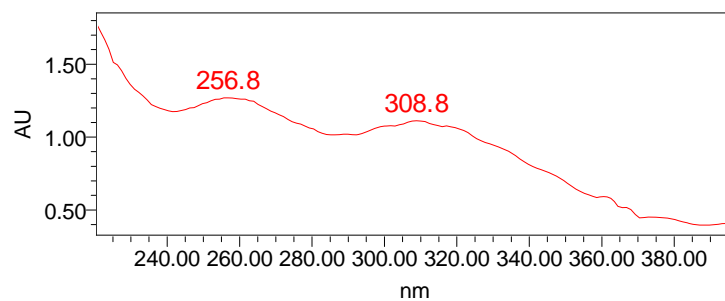

UV spectrum

### HPLC purity determination

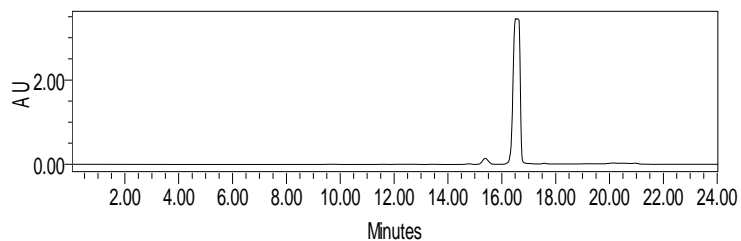

Purity=96.1%,  $t_R$ =16.53 min

### H-NMR spectrum (500 MHz, $CDCl_3$ )

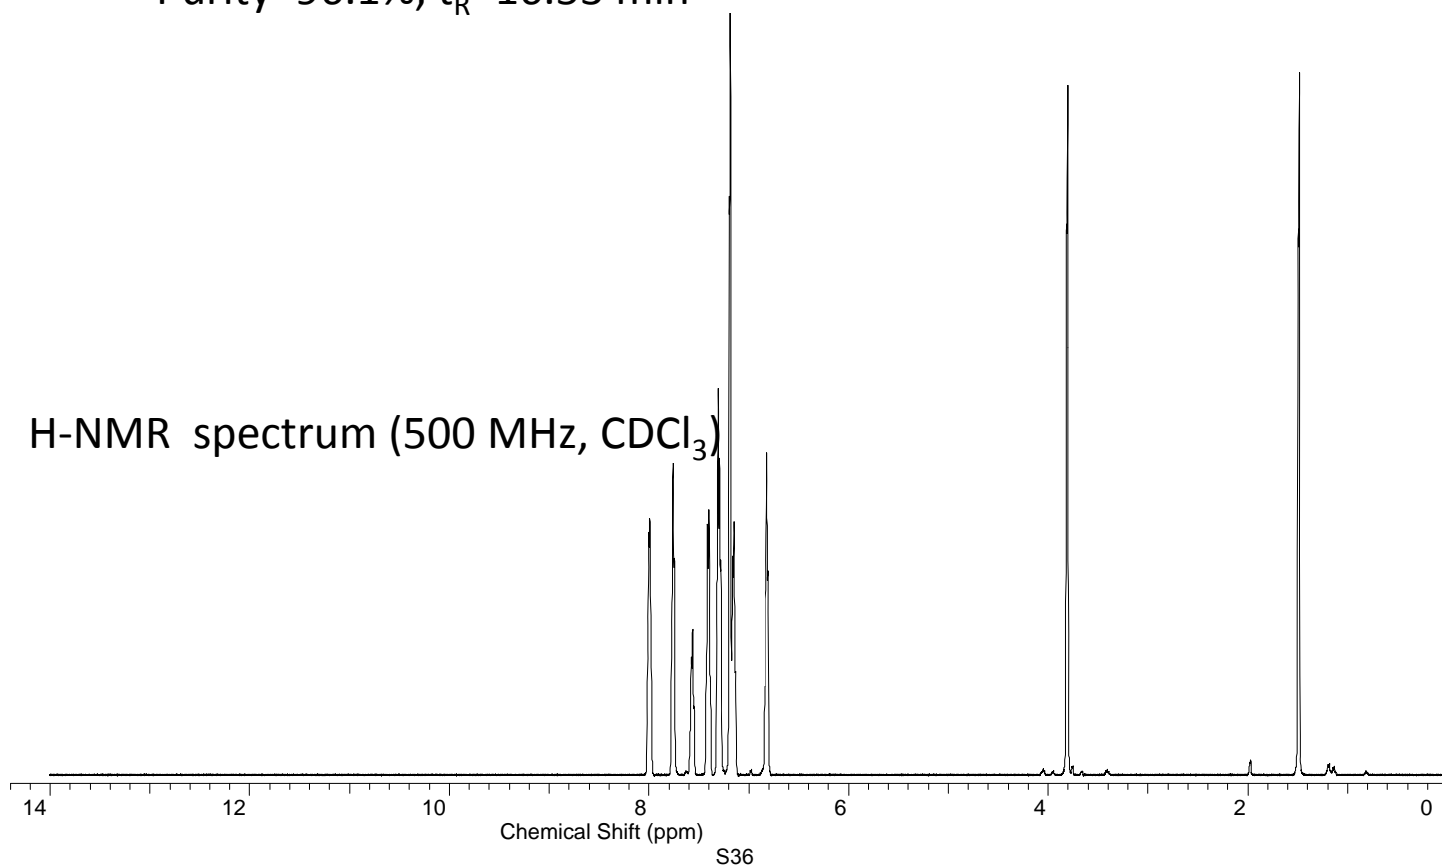



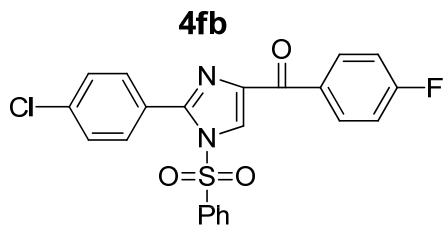

Chemical Formula:  $C_{22}H_{14}ClFN_2O_3S$

Exact Mass: 440.04

Molecular Weight: 440.87

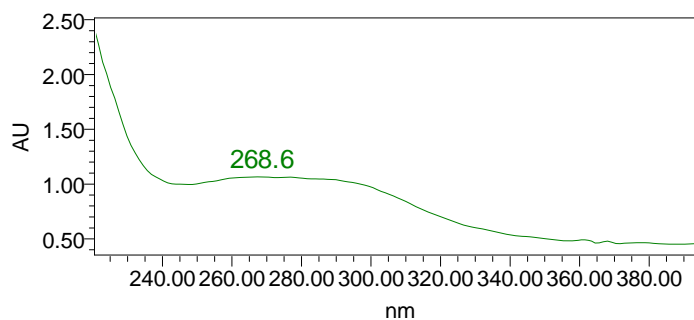

UV spectrum

### HPLC purity determination

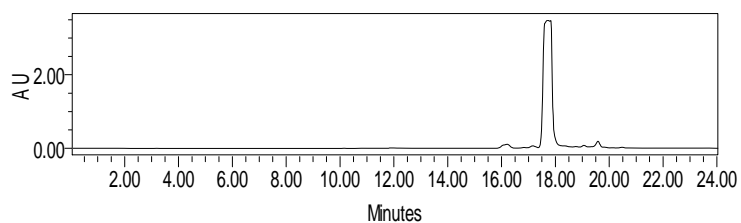

Purity=97.4%,  $t_R=17.72$  min

### H-NMR spectrum (500 MHz, $CDCl_3$ )

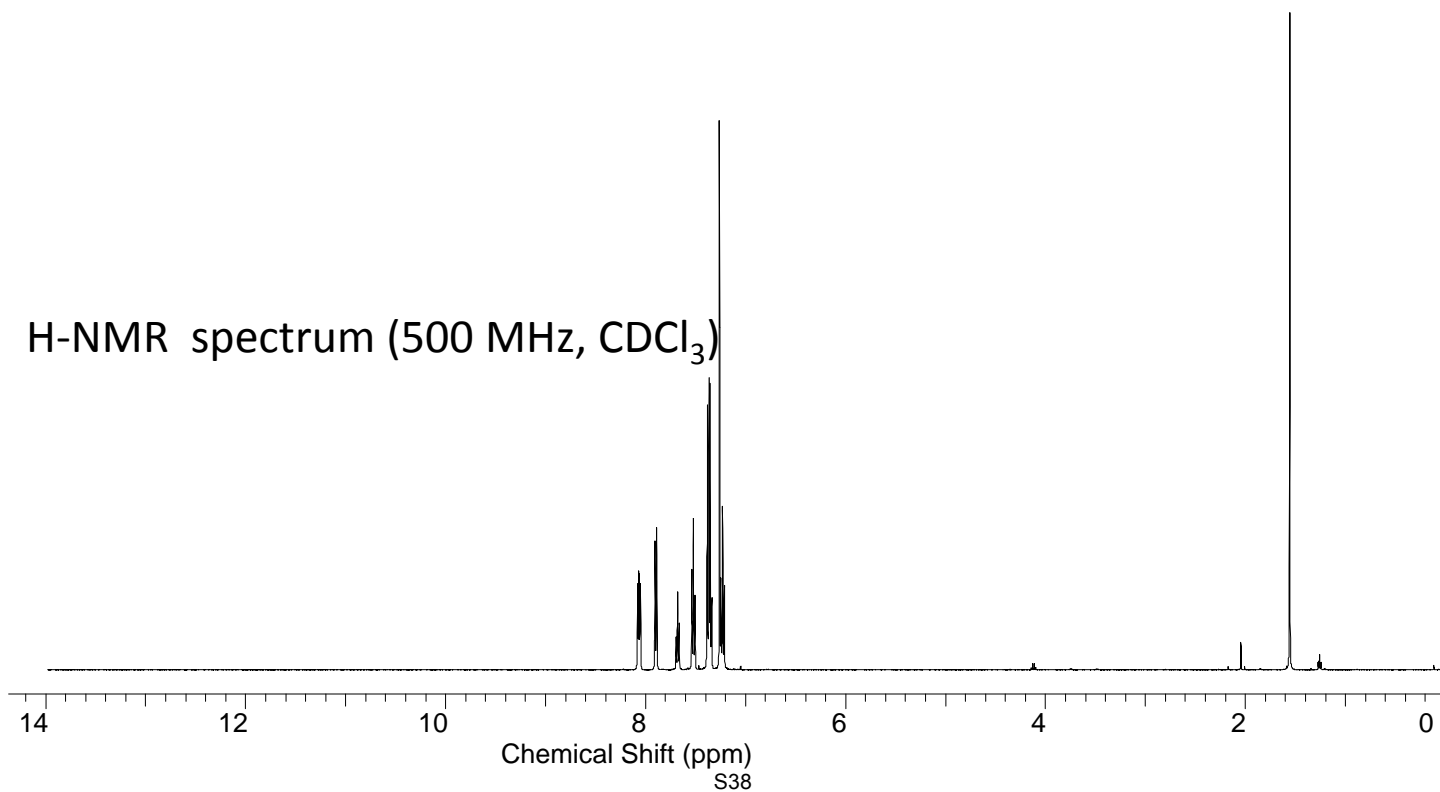

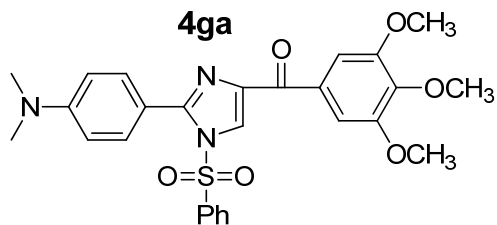

Chemical Formula:  $C_{27}H_{27}N_3O_6S$

Exact Mass: 521.16

Molecular Weight: 521.58

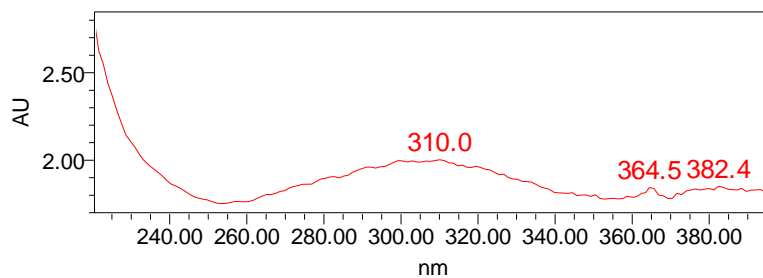

UV spectrum

### HPLC purity determination

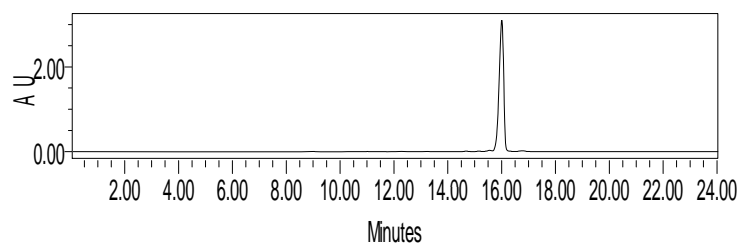

Purity=97.9%,  $t_R$ =16.0 min

### H-NMR spectrum (500 MHz, $CDCl_3$ )

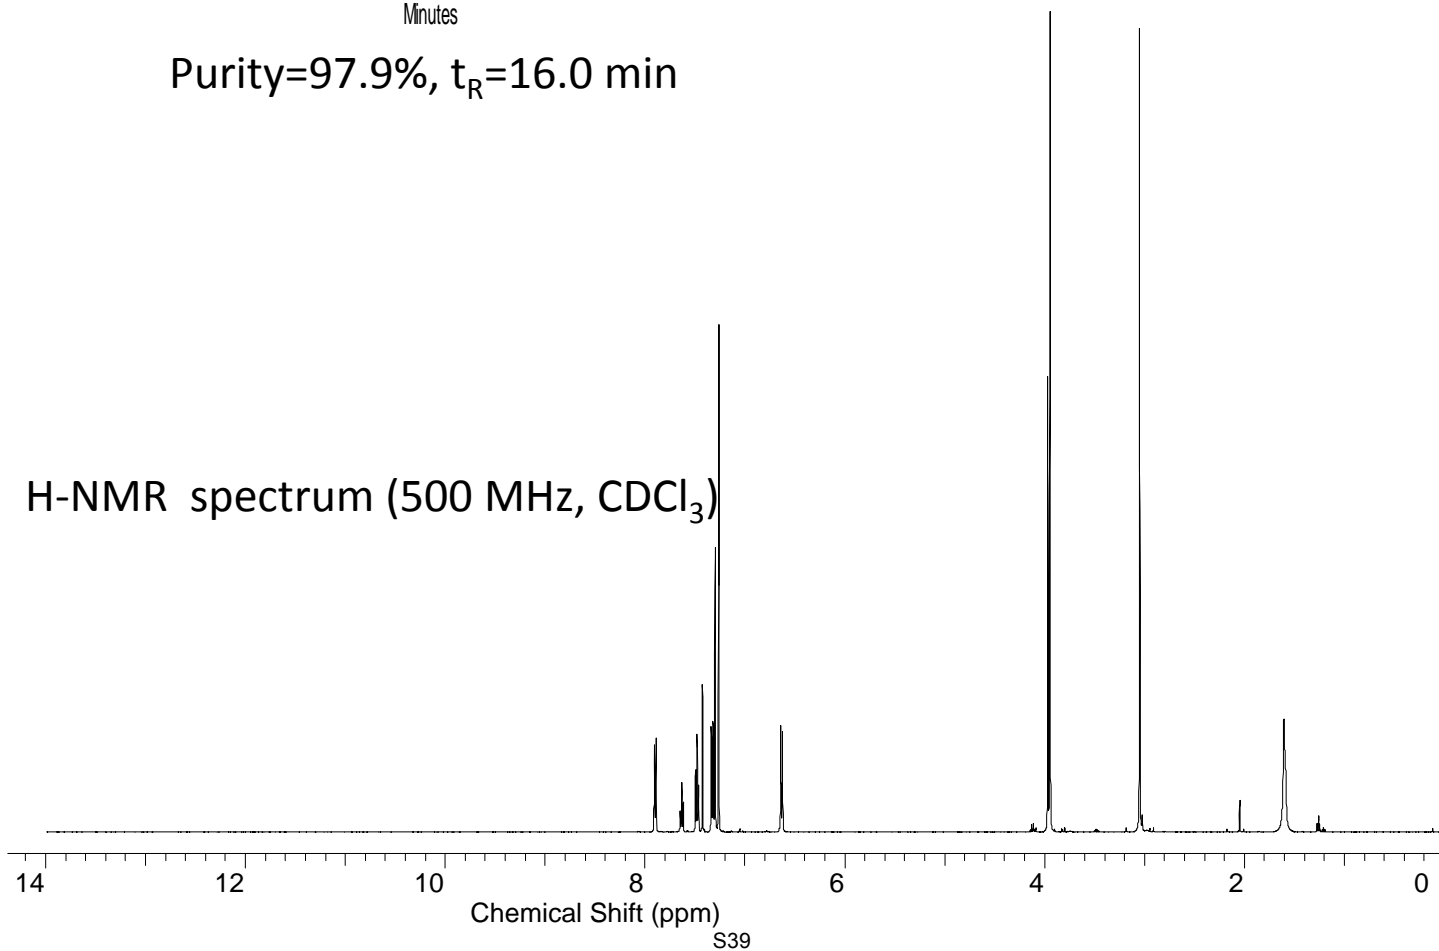

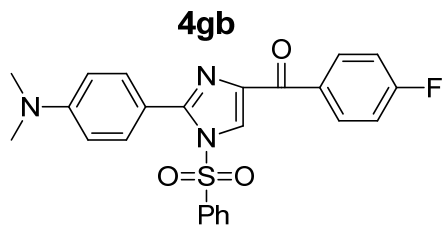

Chemical Formula:  $C_{24}H_{20}FN_3O_3S$

Exact Mass: 449.12

Molecular Weight: 449.50

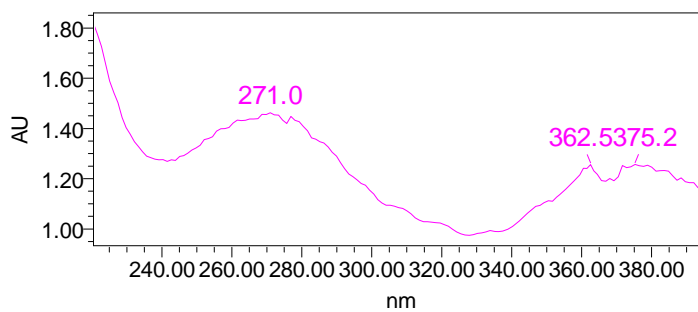

UV spectrum

### HPLC purity determination

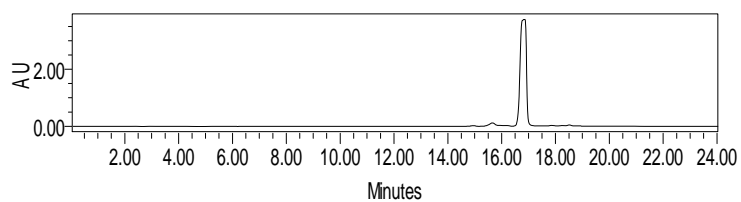

Purity=96.5%,  $t_R$ =16.85 min

### H-NMR spectrum (500 MHz, $CDCl_3$ )

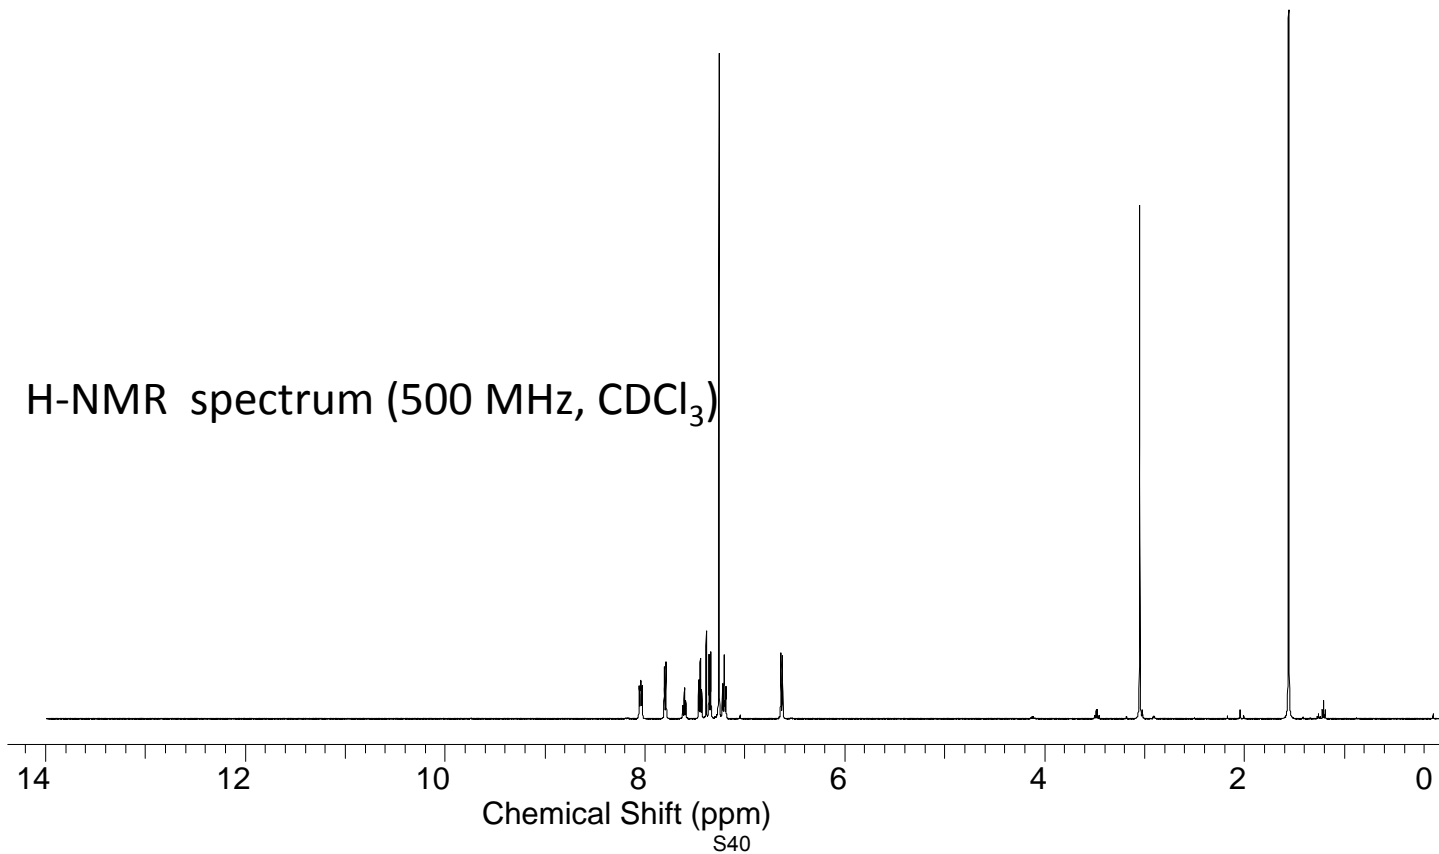



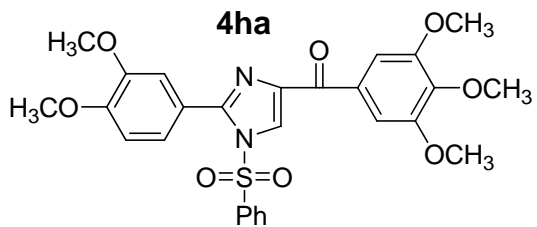

Chemical Formula:  $C_{27}H_{26}N_2O_8S$

Exact Mass: 538.14

Molecular Weight: 538.57

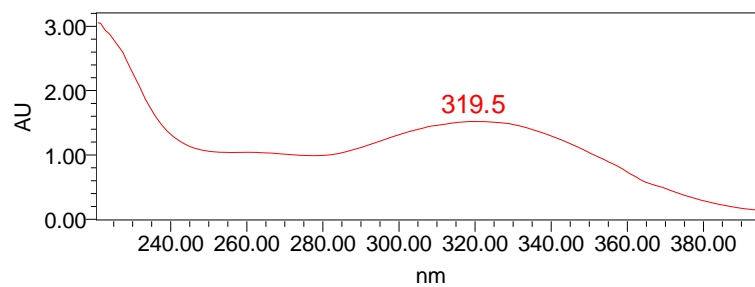

UV spectrum

### HPLC purity determination

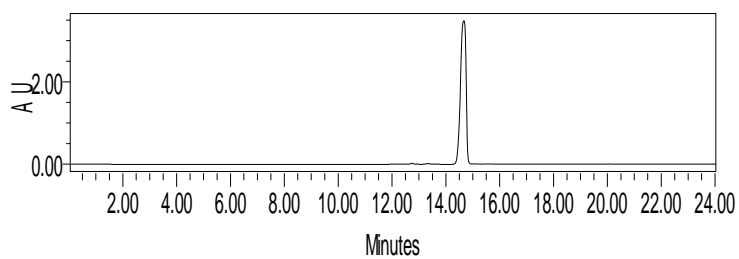

Purity=98.2%,  $t_R=14.67$  min

### H-NMR spectrum (300 MHz, $CDCl_3$ )

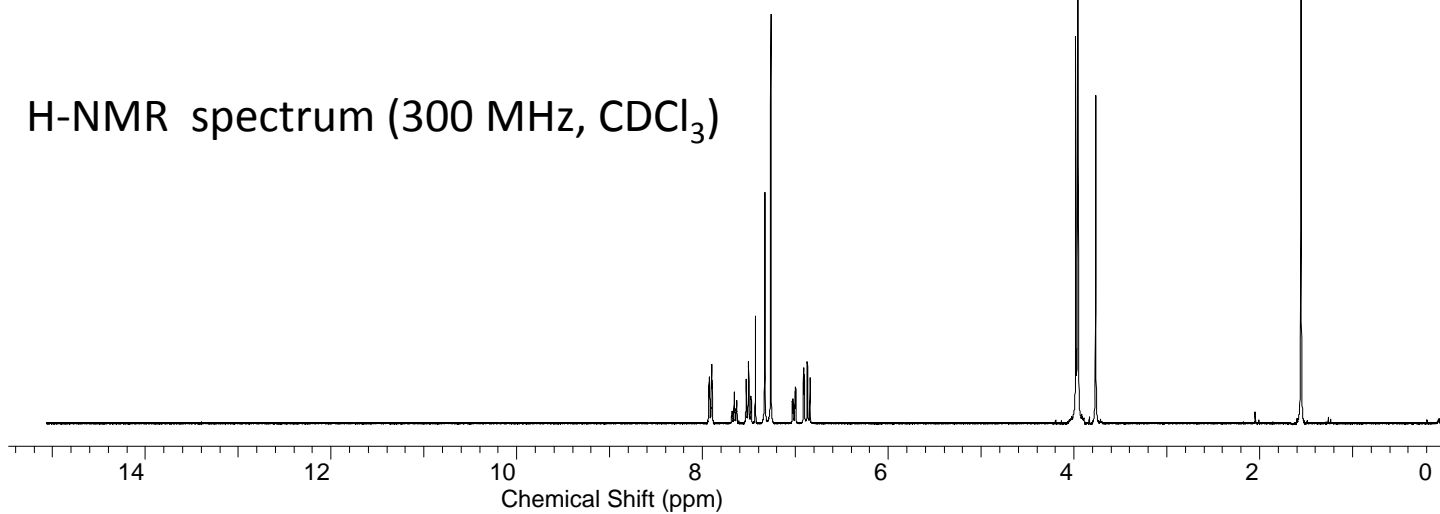

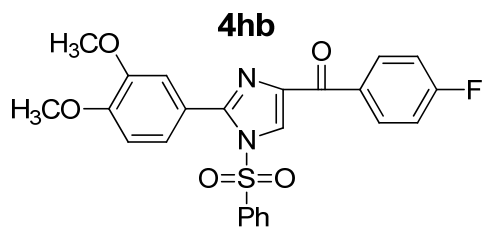

Chemical Formula:  $C_{24}H_{19}FN_2O_5S$

Exact Mass: 466.10

Molecular Weight: 466.48

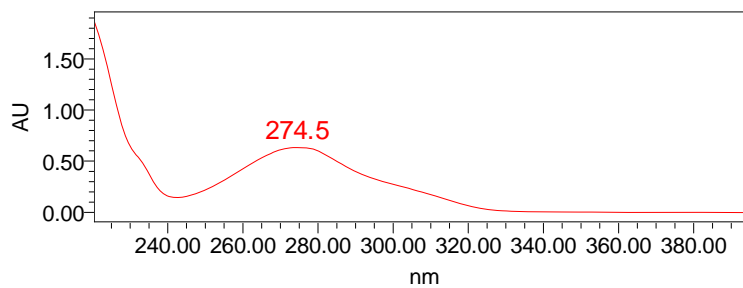

UV spectrum

### HPLC purity determination

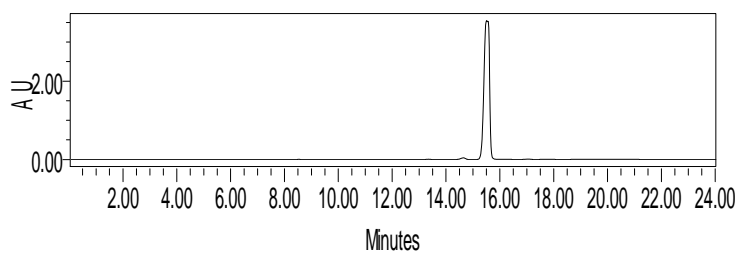

Purity=97.4%,  $t_R$ =15.52 min

### H-NMR spectrum (300 MHz, $CDCl_3$ )

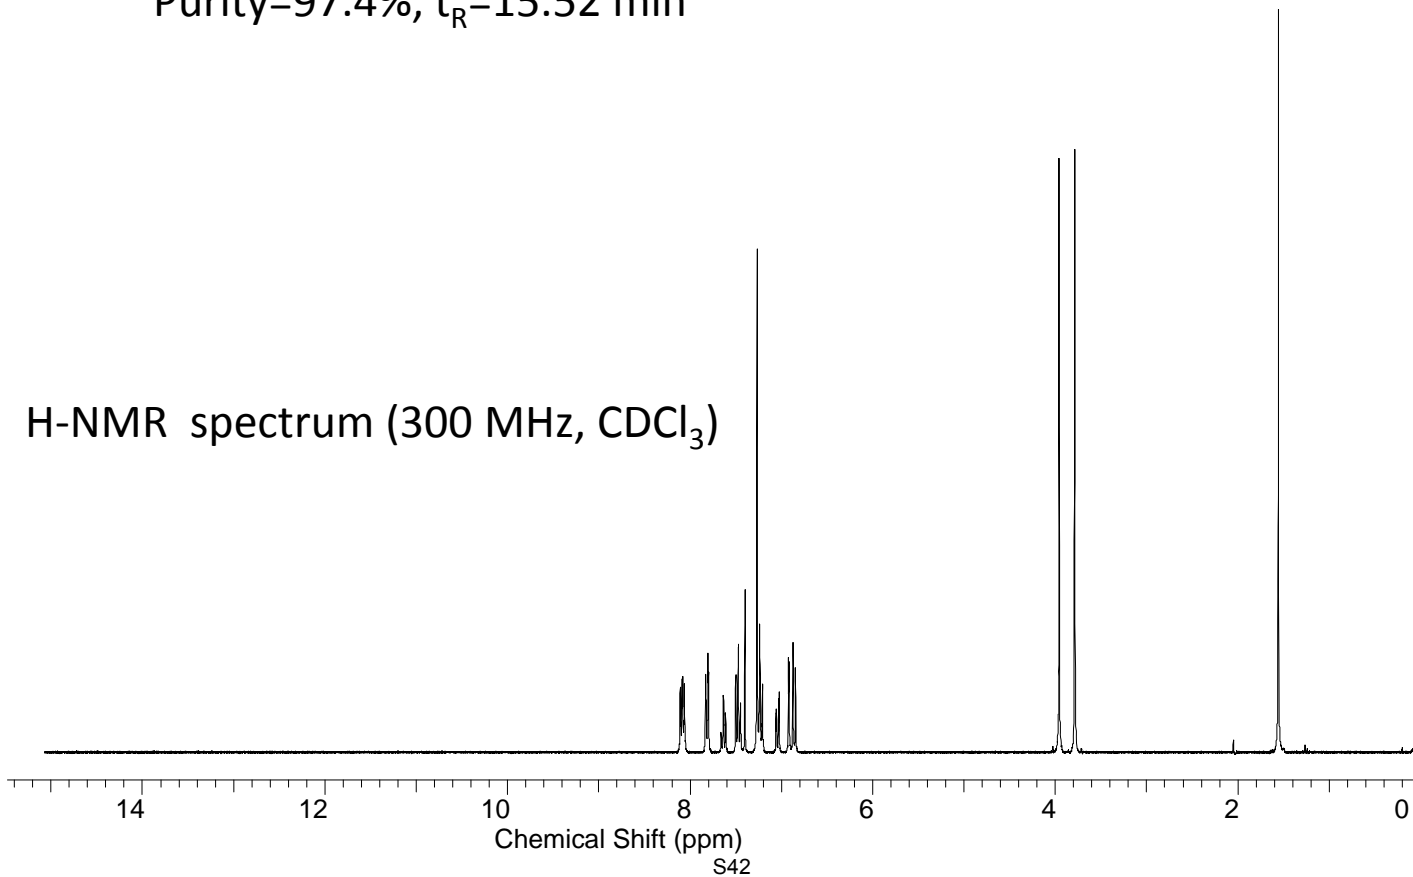

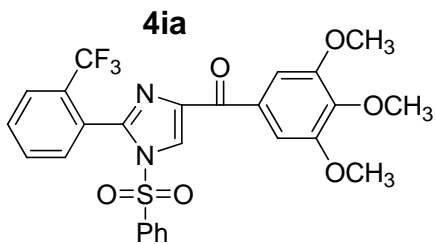

Chemical Formula:  $C_{26}H_{21}F_3N_2O_6S$

Exact Mass: 546.11

Molecular Weight: 546.51

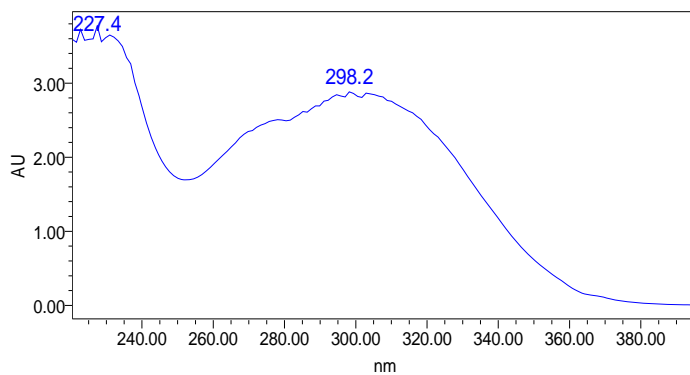

UV spectrum

### HPLC purity determination

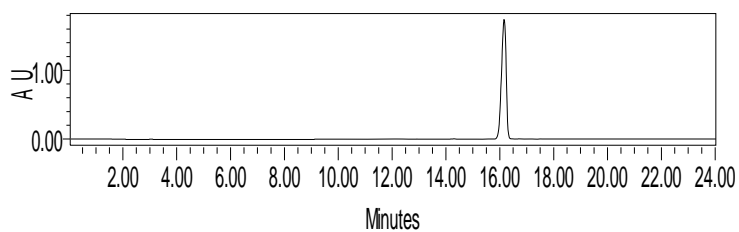

Purity=98.9%,  $t_R$ =16.16 min

### H-NMR spectrum (500 MHz, $CDCl_3$ )

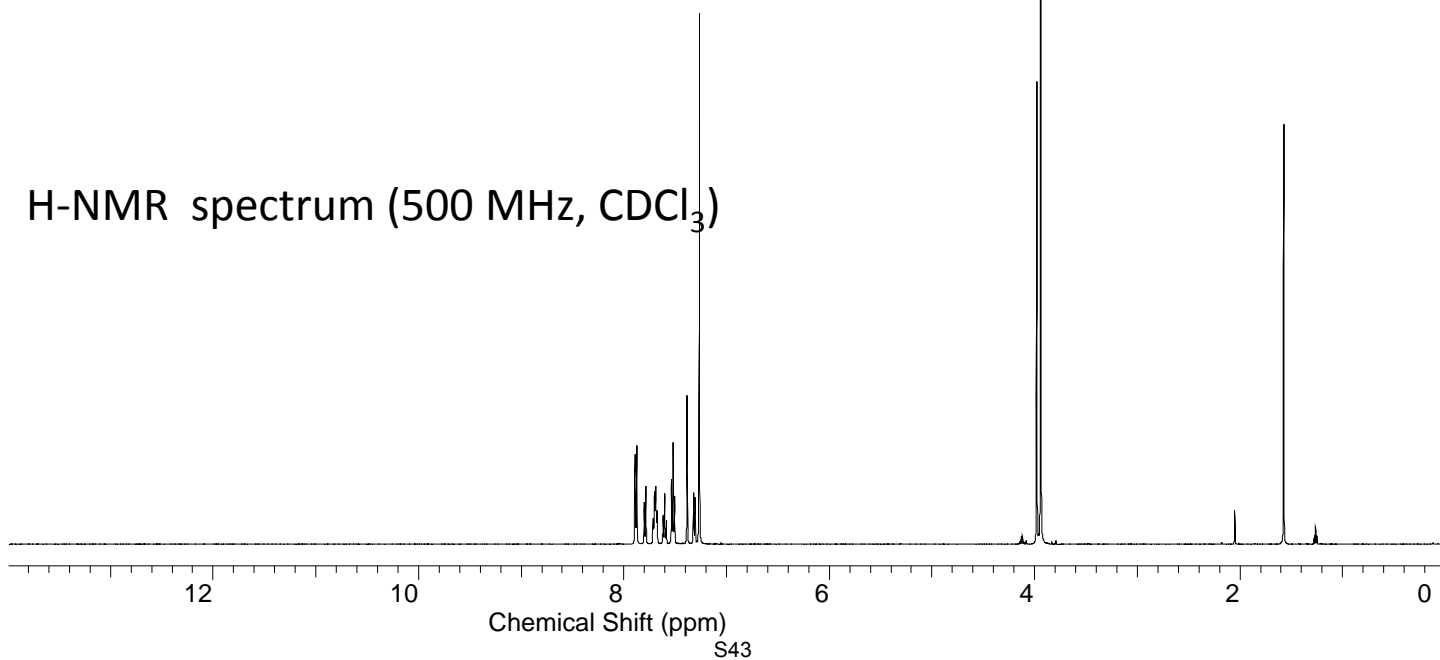

**4ib**

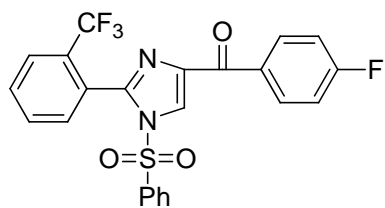

Chemical Formula: C<sub>23</sub>H<sub>14</sub>F<sub>4</sub>N<sub>2</sub>O<sub>3</sub>S

Exact Mass: 474.07

Molecular Weight: 474.43

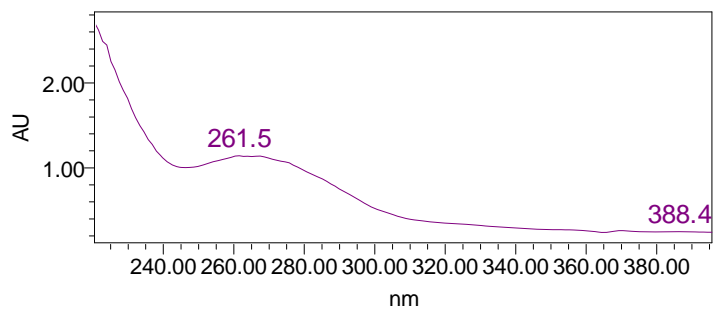

UV spectrum

HPLC purity determination

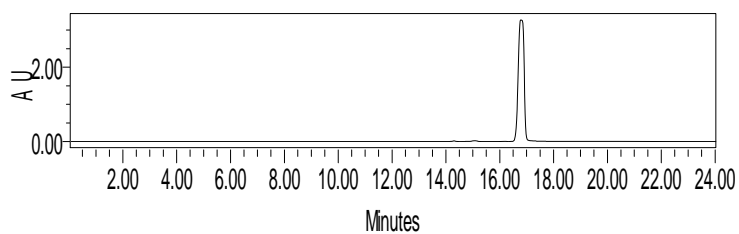

Purity=98.2%, t<sub>R</sub>=16.80 min

H-NMR spectrum (500 MHz, CDCl<sub>3</sub>)

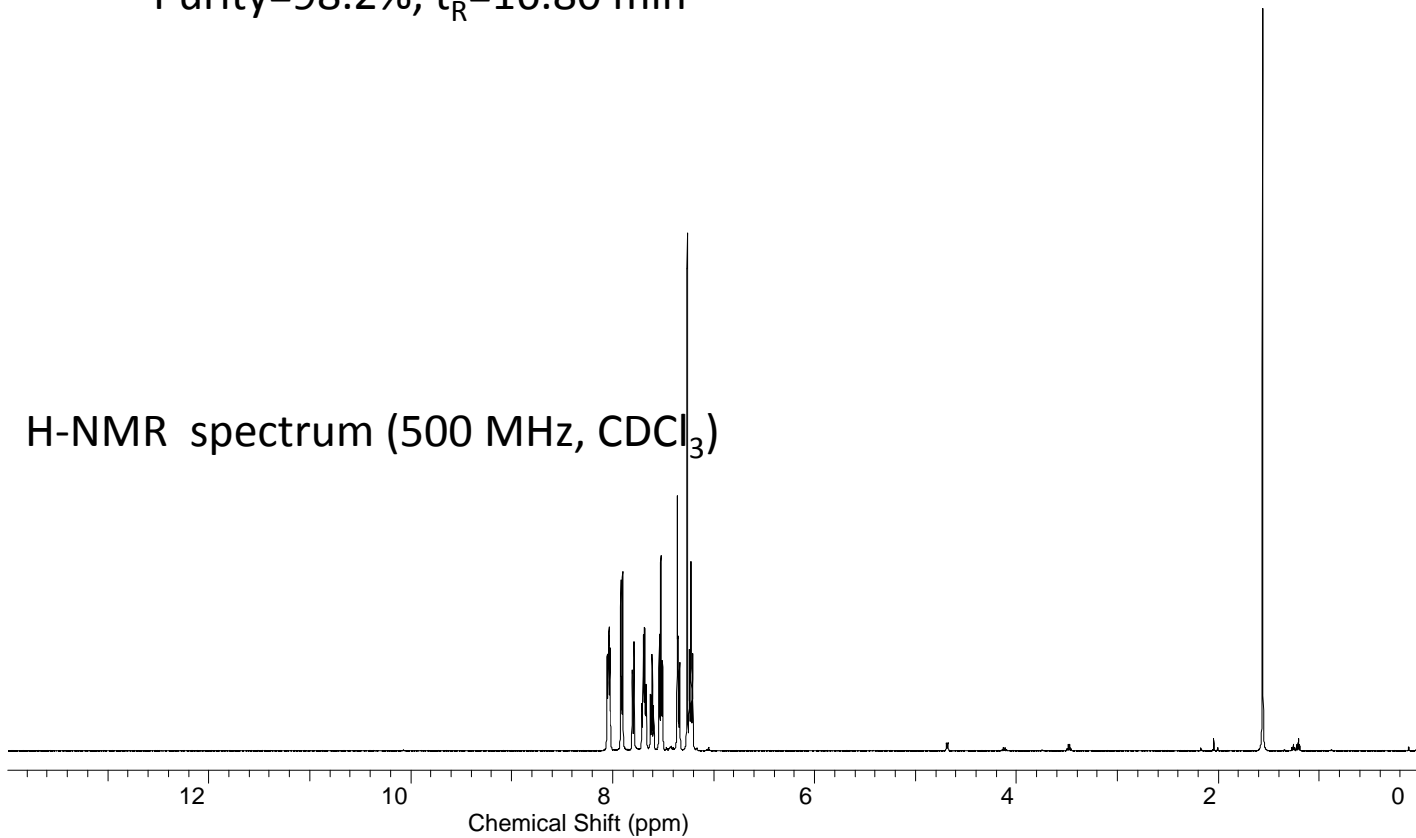

Supplement: NIHMS242385-supplement-1_si_001.pdf [file NIHMS242385-supplement-1_si_001.pdf]
